# Supplementary material for: Glycan–glycan interactions determine Leishmania attachment to the midgut of permissive sand fly vectors
Source: Royal Society of Chemistry journal article supplement (doi:10.1039/d0sc03298k), 2020-01-01
Supplement: d0sc03298k2.zip [file d0sc03298k2.zip]

## Sheet: D exp1 p1
Experiment 1, Parasite 1. Average 52 pN
Pixels	Size
28 x 28	1.5 x 1.5 um		1 pixel = 54 nm x 54 nm
	0	0.054	0.108	0.162	0.216	0.27	0.324	0.378	0.432	0.486	0.54	0.594	0.648	0.702	0.756	0.81	0.864	0.918	0.972	1.026	1.08	1.134	1.188	1.242	1.296	1.35	1.404	1.458	1.512	1.566
0
0.054								1.31698e-11	2.2811e-11	1.84971e-11	4.67803e-11	3.52383e-11	5.68595e-11	6.3709e-11	1.34116e-11	2.92779e-11	4.03472e-11	1.03728e-10	1.78119e-11	1.57692e-11	1.92102e-10	6.41099e-11	1.35942e-11	1.00273e-11	1.6594e-11	1.05602e-10	1.27282e-11	1.67504e-11	1.77157e-11
0.108								2.07522e-11	3.16802e-11	5.14827e-11	1.15163e-11	4.58385e-11	7.47087e-11	1.04826e-10	3.56436e-11	7.44665e-11	4.1003e-11	1.07559e-10	1.7334e-10	1.91588e-11	1.63975e-11	3.92436e-11	2.77015e-11	3.32305e-11	1.68888e-11	7.84577e-11	1.34314e-11	1.13789e-11	2.29127e-11
0.162							5.57808e-11	1.51604e-11	1.22505e-11	1.45463e-11	2.11913e-11	8.07976e-11	2.7357e-11	1.66032e-11	1.91347e-11	7.62321e-11	3.35542e-11	1.95448e-11	7.86241e-11	7.60471e-11	6.95221e-11	7.85523e-11	1.5316e-11	1.83667e-11	3.28221e-11	1.64652e-10	1.51404e-11	1.77426e-11	1.81401e-11
0.216							5.40502e-11	1.5621e-11	9.81422e-11	1.94515e-11	1.98452e-11	8.80636e-11	1.30949e-11	2.43804e-11	1.64177e-11	4.05761e-11	2.49734e-11	9.99686e-12	1.01901e-10	4.94618e-11	7.53496e-11	3.3331e-11	3.50959e-11	5.01027e-11	1.04632e-11	1.42707e-11	1.29981e-10	6.0644e-11	1.90667e-11
0.27							1.58702e-11	1.22669e-11	2.27482e-11	8.38632e-11	1.35756e-11	3.09983e-11	6.18729e-11	1.57811e-11	6.48899e-11	1.29711e-11	1.18632e-10	2.07153e-11	2.05011e-11	1.03253e-10	1.34094e-11	4.0809e-11	1.45346e-11	1.17439e-11	1.47288e-11	1.23219e-11	1.38785e-11	4.70283e-11	3.53668e-11
0.324							6.03574e-11	1.57216e-11	1.81814e-11	9.4273e-12	5.34879e-11	4.42169e-11	9.30622e-11	6.80641e-11	3.2776e-11	6.73858e-11	1.44294e-10	6.9479e-11	9.15344e-11	1.20007e-11	7.96634e-11	8.95035e-12	1.7496e-11	3.4072e-11	1.99905e-11	1.00705e-10	4.88098e-11	3.74095e-11	1.37324e-11
0.378						6.26862e-11	3.38606e-11	9.96055e-11	5.91806e-11	1.15626e-11	5.81873e-11	1.72137e-11	2.72203e-11	4.09277e-11	3.39303e-11	1.85373e-11	3.53259e-11	1.83179e-11	1.58275e-11	6.40217e-11	1.14712e-11	3.80485e-11	5.98736e-11	3.26073e-11	4.15289e-11	7.91936e-11	1.87046e-11	1.47744e-11	4.8255e-11
0.432						4.42186e-11	2.31903e-11	1.4585e-11	5.34262e-11	1.26392e-11	1.13079e-10	2.62526e-11	9.82969e-11	3.44809e-11	6.38107e-11	1.34985e-10	8.7691e-11	7.45654e-11	2.10889e-11	1.26248e-10	1.27963e-11	4.17355e-11	3.32043e-11	6.89936e-11	2.82082e-11	1.47718e-11	1.75036e-11	7.85918e-12	1.51599e-11
0.486						9.70582e-11	4.56487e-11	2.43155e-11	1.0486e-10	1.50821e-11	4.27319e-11	2.15691e-11	9.38626e-11	4.35118e-11	1.41338e-11	2.0963e-11	2.35771e-11	6.14096e-11	1.59351e-11	1.6633e-11	1.54976e-11	6.15994e-11	3.64504e-11	2.10823e-11	1.21433e-11	5.46519e-11	3.49413e-11	5.61401e-11	3.11442e-11
0.54						9.86233e-11	9.88112e-11	4.09936e-11	6.2937e-11	1.54988e-11	2.08823e-10	1.83507e-11	1.02178e-10	5.56426e-11	3.02164e-11	4.65284e-11	3.60759e-11	1.65374e-11	1.7582e-11	1.55139e-11	2.14447e-11	3.33059e-11	1.37746e-11	7.9132e-11	5.00047e-11	1.26774e-10	6.33091e-11	1.15569e-11	2.97198e-11
0.594						6.83632e-11	9.68065e-11	1.38787e-11	1.11548e-10	4.56897e-11	1.74754e-11	3.58483e-11	6.53173e-11	3.04355e-11	8.04942e-11	3.28614e-11	1.05528e-10	2.04813e-11	4.39105e-11	1.30828e-10	1.19216e-11	1.77037e-11	3.36262e-11	4.87998e-11	3.75937e-11	1.35509e-11	4.19849e-11	6.32959e-11	1.33491e-11
0.648					6.01953e-11	1.31212e-10	1.79397e-11	1.14617e-11	1.48058e-11	1.86474e-11	6.52951e-11	1.54301e-11	2.98718e-11	1.05806e-10	1.94261e-11	6.40078e-11	1.4412e-11	6.60914e-11	1.37284e-11	1.48344e-11	1.25565e-11	1.60264e-11	3.68665e-11	2.22062e-11	2.84693e-11	3.47362e-11	4.98189e-10	4.49628e-11	1.11571e-10
0.702					7.92029e-12	5.13072e-11	2.76918e-11	1.84709e-11	6.08655e-11	1.40237e-11	1.55727e-11	2.02152e-11	1.45034e-11	2.48195e-11	2.14459e-11	7.2465e-11	5.13687e-11	1.82152e-11	2.12229e-11	1.74253e-11	6.36217e-11	1.3791e-11	1.11859e-11	3.67493e-11	2.60807e-11	7.73674e-11	1.84945e-11	2.20439e-11	1.39529e-11
0.756			4.43453e-11	6.85931e-11	2.64988e-11	1.136e-09	1.05732e-10	1.33211e-10	1.03455e-11	1.22461e-11	4.58501e-11	1.26563e-10	1.47421e-11	4.20089e-11	1.50338e-11	4.65305e-11	1.37585e-11	1.33497e-11	3.61906e-11	3.27283e-11	9.88798e-11	1.38552e-11	4.49755e-11	5.54675e-11	1.15711e-09	8.18963e-12	1.85457e-11	3.34703e-11	1.77089e-11
0.81			1.43126e-11	6.01123e-11	4.5235e-11	5.55431e-11	4.63464e-11	1.20436e-11	4.71252e-11	6.21041e-11	2.40647e-11	1.44562e-11	1.81633e-11	1.86986e-11	1.31128e-11	2.51266e-11	1.05249e-11	2.20019e-11	3.67667e-11	2.23761e-11	2.11016e-11	1.42651e-11	1.62805e-11	1.35306e-11	2.32943e-11	6.56337e-11	1.55953e-11	2.39056e-11	1.57528e-11
0.864			1.62179e-11	4.92581e-11	4.63932e-11	3.51483e-11	1.55682e-11	1.40741e-11	5.18285e-11	7.14075e-11	9.7689e-12	2.53251e-11	1.3516e-11	2.41611e-11	3.49157e-11	1.95072e-11	2.40153e-11	5.70521e-11	1.10981e-11	1.91372e-11	1.68815e-11	2.95053e-10	3.8254e-11	1.3445e-11	4.21673e-11	4.19917e-11	1.58328e-11	2.83784e-11	9.99168e-11
0.918			1.09119e-11	3.5926e-11	7.68953e-11	1.83093e-11	1.41727e-11	1.60131e-11	1.08015e-11	4.02968e-11	2.08626e-11	1.41417e-11	4.29708e-11	7.05565e-12	1.86428e-11	4.60462e-11	5.41395e-11	6.04904e-11	1.72386e-11	4.19805e-11	2.92192e-11	1.85522e-11	1.67874e-11	1.95755e-11	1.17303e-11	1.63813e-11	1.50917e-11	2.05941e-11	2.16076e-11
0.972			2.89071e-11	1.71973e-11	1.60496e-11	7.42086e-11	2.96225e-11	1.53058e-11	7.10772e-11	3.44363e-11	1.47186e-11	1.45102e-10	1.54064e-10	1.04262e-10	1.79335e-11	1.95203e-11	1.27786e-11	1.95211e-10	7.56428e-11	6.09142e-11	2.7824e-11	3.38428e-11	1.83813e-11	8.35316e-11	1.19143e-11	2.05223e-11	1.4753e-10	3.35353e-11	4.79019e-11
1.026		3.42768e-11	2.2849e-11	1.50992e-11	8.46589e-12	1.61036e-11	8.56505e-11	1.42415e-11	8.74237e-11	1.93211e-11	3.11744e-11	1.71167e-11	1.52321e-10	4.46897e-11	1.02154e-11	1.45585e-11	8.33716e-11	3.22644e-11	3.9227e-11	2.5004e-11	6.44381e-11	1.24726e-11	1.90064e-11	2.32805e-11	5.54844e-11	1.80057e-11	1.85143e-11	5.95696e-11	4.17875e-11
1.08		1.11057e-11	7.76834e-12	2.21462e-11	1.45113e-11	3.78987e-11	1.27672e-11	5.75389e-11	1.4992e-11	2.72125e-11	4.00759e-11	5.65897e-11	8.9255e-11	1.49215e-11	1.07897e-10	1.33396e-11	2.98111e-11	2.00222e-11	1.02662e-10	2.84228e-11	2.80614e-11	4.5972e-11	8.24342e-11	1.66169e-11	2.88264e-11	8.57656e-11	1.3264e-11	2.10578e-11	2.40101e-11
1.134		1.66565e-11	4.84969e-11	1.48452e-11	2.60369e-11	5.82381e-11	5.24724e-11	1.06563e-10	6.02536e-11	1.16471e-11	1.51609e-10	1.42367e-11	1.34368e-10	3.4326e-11	9.8275e-11	2.83032e-11	1.11133e-10	1.31398e-11	2.28149e-11	8.0116e-11	2.81237e-11	2.75659e-11	1.01917e-10	1.05455e-11	5.46455e-11	1.38076e-11	1.46755e-11	1.75357e-11	1.3112e-11
1.188		1.39802e-11	5.56196e-11	4.48726e-11	5.47685e-11	7.6377e-11	4.82591e-11	9.74907e-11	5.73104e-11	3.79978e-11	6.589e-11	1.49146e-11	3.29914e-11	7.92252e-11	2.65401e-11	1.59582e-11	1.94383e-11	5.58821e-11	6.19308e-11	2.79966e-11	2.77444e-11	7.41273e-11	2.76101e-11	1.27049e-11	2.85696e-11	4.1591e-11	1.5904e-11	1.04783e-11	3.17644e-11
1.242		4.42903e-11	1.87768e-11	1.60703e-11	1.62891e-11	2.43438e-11	8.84083e-11	4.09254e-11	1.17399e-10	7.82105e-11	4.74181e-11	2.07577e-11	1.06418e-11	6.88489e-11	6.99786e-11	6.95773e-11	9.82423e-12	2.61134e-11	1.59827e-11	3.05366e-11	1.53782e-11	1.16436e-10	1.47534e-11	1.5594e-10	1.93871e-11	2.40857e-11	1.17268e-10	8.12198e-11	1.14303e-11
1.296		8.1788e-11	3.96088e-11	1.65902e-11	4.96378e-11	1.89747e-11	4.38809e-11	1.75903e-11	3.48586e-11	3.79186e-11	3.15113e-11	1.56467e-11	1.47047e-11	4.80114e-11	1.74589e-11	3.64285e-11	1.65158e-11	1.23628e-10	5.11766e-11	3.97434e-11	1.84928e-11	1.00353e-11	1.06781e-10	3.2412e-11	3.12085e-11	3.38652e-11	6.92858e-11	4.95015e-11
1.35		7.55934e-10	1.44229e-11	1.62116e-11	5.4169e-11	1.67961e-11	1.63246e-11	1.51402e-11	1.6102e-10	4.20252e-11	2.21092e-11	5.78655e-11	2.12887e-10	2.06388e-11	3.30143e-11	1.27548e-10	8.33839e-11	2.72009e-10	8.03223e-10	1.62132e-11	1.10402e-10	1.13047e-10	1.46086e-11	1.75222e-11	2.28469e-11	3.28965e-10	1.56958e-11	7.44497e-11
1.404		1.30044e-11	4.1339e-11	7.0696e-11	1.70956e-11	1.41522e-10	4.58617e-11	5.33346e-11	4.14589e-11	1.88041e-10	1.07407e-10	1.25003e-10	6.98425e-11	5.80404e-11	1.47446e-11	1.76444e-10	2.32121e-10	3.74833e-11	5.75143e-11	3.90326e-11	1.43312e-11	2.83465e-11	1.098e-10	1.76207e-11	7.42063e-11	4.54417e-11	1.6463e-11	3.38481e-11
1.458		3.88427e-11	2.24966e-11	1.47229e-11	1.42566e-11	6.41473e-11	4.27195e-11	1.21882e-10	1.20011e-10	1.16348e-10	1.12702e-11	6.25988e-11	1.70004e-11	2.05948e-11	2.64774e-11	1.62911e-10	6.22073e-11	2.38312e-11	2.84809e-10	1.42133e-11	2.00504e-10	1.31336e-11	8.10687e-11	1.22792e-10	1.42839e-11	2.71162e-11	8.51968e-11	9.10724e-11
1.512		1.62533e-11	1.85254e-11	1.67334e-11	1.56118e-11	3.41621e-11	3.09308e-10	1.90349e-10	1.43407e-10	2.5552e-10	2.36103e-11	1.55129e-11	2.66426e-11	1.94297e-11	1.50724e-11	3.37379e-11	1.56587e-11	1.37287e-11	1.59784e-10	3.83979e-11	2.76798e-11	2.77406e-11	2.53354e-11	1.2005e-10	1.54575e-11	1.11958e-10	6.56665e-11	4.90901e-11
1.566

## Sheet: D exp1 p2
Experiment 1, Parasite 2. Average force 29.6 pN.
Pixels	Size
28 x 28	1.5 x 1.5 um		1 pixel = 54 nm x 54 nm
	0	0.054	0.108	0.162	0.216	0.27	0.324	0.378	0.432	0.486	0.54	0.594	0.648	0.702	0.756	0.81	0.864	0.918	0.972	1.026	1.08	1.134	1.188	1.242	1.296	1.35	1.404	1.458	1.512	1.566
0
0.054		6.46504e-11	1.82786e-11	1.80393e-11	6.9711e-11	5.51057e-11	3.42539e-11	1.79301e-11	1.5848e-11	2.51581e-11	1.97018e-11	1.83127e-11	1.62443e-11	1.65207e-11	1.31867e-11	1.69109e-11	2.246e-11	1.61133e-11	1.32745e-11	2.72414e-11	1.5954e-11	1.31403e-11	1.64931e-11	2.05228e-11
0.108		1.35129e-11	1.66742e-11	1.87516e-11	1.01877e-11	1.44529e-11	4.78961e-11	1.91429e-11	8.84936e-11	1.64333e-11	2.10767e-11	1.59767e-11	1.58757e-11	2.15853e-11	4.66433e-11	1.34883e-11	2.28695e-11	1.34089e-11	1.57354e-11	1.63551e-11	1.91421e-11	2.71104e-11	3.18249e-11	2.22011e-11
0.162		2.43795e-11	1.56449e-11	1.55562e-11	1.19297e-11	1.69585e-10	1.72176e-11	8.30145e-11	1.95241e-11	1.85751e-11	1.39607e-11	4.69331e-11	2.16168e-11	5.78971e-11	2.10688e-11	1.67617e-11	1.8411e-11	1.33393e-11	1.90535e-11	2.45763e-11	5.68757e-11	1.18631e-11	1.58208e-11	3.6711e-11	1.26856e-11	1.80219e-11
0.216		1.46762e-11	2.52104e-11	9.20783e-12	1.21651e-11	4.52851e-11	3.95105e-11	1.83482e-11	1.48232e-11	1.65315e-11	4.45446e-11	1.89135e-11	1.46373e-11	1.71445e-11	1.61656e-11	1.80277e-11	1.47581e-11	1.11957e-11	1.88762e-11	6.46101e-12	1.85673e-11	2.58423e-11	2.60071e-11	5.1738e-11	5.69654e-11	2.22677e-11
0.27		1.63717e-11	1.35942e-11	9.9637e-12	4.12575e-11	3.93062e-11	1.93065e-11	1.73297e-11	1.17436e-11	1.79637e-11	1.73721e-11	1.39193e-11	1.8749e-11	1.36672e-11	2.24706e-11	1.69329e-11	1.63717e-11	1.17021e-10	1.83687e-11	1.66237e-11	7.46869e-11	1.33388e-10	1.75978e-11	3.68272e-11	1.35985e-11	5.29708e-11
0.324		3.96015e-11	1.78758e-11	2.45891e-11	2.96468e-11	3.44479e-11	3.04639e-11	4.38526e-11	1.93619e-11	1.52333e-11	1.54277e-11	1.93092e-11	1.87112e-11	2.28292e-11	1.65063e-11	1.90218e-11	2.99883e-11	1.59865e-11	2.31675e-11	2.21804e-11	1.9984e-11	8.36653e-11	1.61453e-11	2.35625e-10	1.67716e-11	3.13243e-11	8.16807e-11	2.28517e-11
0.378		1.45504e-11	1.72797e-11	1.72194e-11	1.30093e-11	1.4961e-11	3.5694e-11	2.09432e-11	5.42384e-11	1.2611e-10	1.73987e-11	1.84587e-11	1.7502e-11	2.52363e-11	1.40125e-11	2.18053e-11	2.1449e-11	1.84006e-11	1.78796e-11	2.18796e-11	1.48749e-11	6.1654e-11	2.31525e-11	2.40737e-11	2.22859e-11	2.25703e-11	1.90424e-11	1.93014e-11	2.2949e-11
0.432		1.50267e-10	1.89011e-11	1.81485e-11	7.22248e-11	1.73736e-11	1.78571e-11	1.86802e-11	2.29167e-11	1.94533e-11	1.29416e-11	3.07196e-10	1.71472e-11	1.9715e-11	1.61612e-11	1.85163e-11	1.48961e-11	2.69765e-10	1.64125e-11	3.5741e-11	1.65628e-11	1.91782e-11	2.03847e-11	2.22751e-11	2.39195e-11	6.34943e-11	3.53272e-11	2.01104e-10	2.46264e-11
0.486		3.136e-11	6.59047e-11	1.39773e-11	1.7931e-11	1.96119e-11	2.05343e-11	1.7961e-11	1.45147e-11	2.37304e-11	1.7012e-10	1.68009e-11	1.87542e-11	1.77634e-11	1.50448e-11	1.63274e-11	1.76433e-11	1.9386e-11	1.47805e-11	1.8695e-11	2.00251e-11	1.7649e-11	2.02852e-11	2.38679e-11	1.41556e-11	1.85417e-11	2.07314e-11	1.75521e-11	1.57436e-11
0.54		1.40223e-11	2.87696e-11	1.4651e-11	2.04105e-11	3.91815e-11	4.46395e-11	1.36859e-11	3.6344e-11	1.34611e-11	2.37306e-11	1.78823e-11	1.12006e-11	2.15269e-11	2.10575e-11	1.39944e-11	1.87624e-11	2.77335e-11	2.51419e-11	2.66756e-11	1.05869e-11	8.93688e-11	1.68414e-11	1.89353e-11	7.97972e-11	1.39251e-11	1.63215e-11	1.47161e-11	2.01856e-11
0.594		1.43346e-11	5.38908e-11	1.69265e-11	2.44698e-11	2.56719e-11	1.94961e-11	2.1503e-11	1.77497e-10	1.95686e-11	5.87157e-11	1.52636e-11	3.43726e-11	1.76383e-11	2.00428e-11	3.32305e-11	4.56488e-11	1.80574e-11	2.07982e-11	1.50886e-11	1.7037e-11	2.59687e-11	1.97354e-11	2.29981e-11	1.91846e-11	1.69202e-11	1.77283e-11	2.1401e-11	1.63577e-11
0.648		1.43897e-11	5.89576e-11	1.7373e-11	2.10927e-11	1.58618e-11	1.94132e-11	5.33609e-11	1.70598e-11	2.0389e-11	1.82313e-11	1.37476e-11	1.64424e-11	3.5211e-11	2.01279e-11	1.65725e-11	1.48496e-11	1.70786e-11	3.50339e-11	2.97358e-11	1.40295e-11	4.69479e-11	2.51613e-11	1.16395e-11	1.84085e-11	1.67413e-11	1.56797e-11	1.48648e-11	1.7005e-11
0.702		1.19371e-11	1.45575e-11	1.67609e-11	1.64413e-11	1.69085e-11	1.63259e-11	1.80635e-11	2.17116e-11	1.6735e-11	1.59126e-11	2.44222e-11	1.49756e-11	1.32385e-11	1.34351e-11	1.84176e-11	1.53387e-11	2.21325e-11	1.66593e-11	3.03743e-11	2.23682e-11	1.80509e-11	1.88529e-11	1.65355e-11	1.59587e-11	1.68916e-11	2.0372e-11	1.66694e-11	1.5881e-11
0.756		2.08413e-11	1.48572e-11	7.59172e-11	1.58081e-11	1.35197e-11	1.61154e-11	2.30466e-11	1.82569e-11	1.75526e-11	4.60111e-11	1.05642e-11	2.16583e-11	1.58725e-11	1.70941e-11	1.87578e-11	3.24988e-11	1.52206e-11	1.38723e-11	3.49437e-11	1.19972e-11	1.90867e-11	7.54736e-11	4.69528e-11	1.84118e-11	1.84379e-11	2.00103e-11	1.69778e-11	2.45629e-11
0.81		8.34577e-12	1.65874e-11	1.63145e-11	1.97764e-11	2.13036e-11	6.5867e-11	1.57026e-11	1.7855e-11	1.75564e-11	1.24639e-11	8.60334e-12	1.5517e-11	1.52418e-11	1.91022e-11	1.48099e-11	1.89585e-11	3.65587e-11	1.49797e-11	2.35531e-11	2.72516e-11	2.94517e-11	1.6589e-11	6.62589e-11	2.19609e-11	1.58e-11	1.74945e-11	1.20346e-11	1.19323e-11
0.864		1.86658e-11	2.26014e-11	1.93374e-11	4.56253e-11	1.75961e-11	8.04416e-11	1.67413e-11	1.23638e-11	1.97754e-11	1.6833e-11	1.81885e-11	1.64068e-11	2.0235e-11	1.31296e-11	2.1604e-11	2.00121e-11	2.01601e-11	1.5562e-11	1.70761e-11	1.99144e-11	3.79058e-11	1.78797e-11	1.45615e-11	1.16463e-11	1.36039e-11	1.85673e-11	2.04085e-11	5.52703e-11
0.918		1.85959e-11	6.34438e-11	1.64509e-11	1.56999e-11	1.97269e-11	1.37174e-11	1.63354e-11	1.63637e-11	5.04437e-11	1.61698e-11	1.134e-11	1.66544e-11	1.37717e-11	1.65932e-11	1.49171e-11	1.25614e-11	1.41354e-11	1.63558e-11	1.68563e-11	2.09181e-11	1.43065e-11	9.49323e-12	1.64834e-11	1.62837e-11	5.29187e-11	1.90616e-11	8.09264e-11	1.56855e-10
0.972		1.48221e-11	1.14509e-11	2.76479e-10	3.25312e-11	1.54605e-11	4.53815e-11	1.72611e-11	2.25673e-11	1.26303e-11	1.71841e-11	1.79434e-11	1.79333e-11	1.59124e-11	1.67947e-11	2.03016e-11	1.58451e-11	1.76357e-11	1.28346e-11	1.35293e-11	2.566e-10	4.17607e-11	3.10398e-11	2.10565e-11	1.81513e-11	6.96765e-11	2.06127e-11	6.2839e-11	4.59602e-11
1.026		5.73447e-11	5.85122e-11	1.6029e-11	1.35837e-11	1.84384e-11	1.41887e-11	2.01871e-11	1.37834e-11	2.12307e-11	2.27509e-11	1.65692e-11	1.55541e-11	2.18955e-11	1.37343e-11	3.37864e-10	8.94889e-11	2.60595e-11	1.76395e-11	3.01608e-11	1.34266e-11	1.7219e-11	1.75729e-11	1.58869e-11	1.67199e-11	2.46435e-11	2.3445e-11	3.80189e-11	5.31892e-11
1.08		3.07851e-11	2.36552e-11	1.39277e-11	1.66311e-11	2.20391e-11	1.60993e-11	2.00886e-11	1.68296e-10	1.91026e-11	1.95388e-11	1.85924e-11	1.78759e-11	2.57056e-11	2.10384e-11	2.6157e-10	1.61804e-11	1.66044e-11	2.65592e-11	2.12397e-11	1.87416e-11	1.76852e-11	2.1808e-11	1.8033e-11	1.2286e-11	2.01642e-11	1.93502e-11	3.53213e-11	2.20962e-11
1.134		2.16398e-11	1.13889e-11	1.88367e-11	1.63614e-11	1.28709e-10	1.44806e-11	1.79718e-11	2.49826e-11	1.8921e-11	1.98001e-11	2.01839e-11	2.01448e-11	1.86684e-11	1.99522e-11	1.53072e-11	1.40509e-11	2.49589e-10	2.07968e-11	2.1319e-11	1.82173e-11	1.91659e-11	1.56615e-11	1.53174e-11	1.5261e-11	1.69134e-11	1.63056e-11	1.45637e-11	2.947e-11
1.188		1.78943e-11	2.12049e-11	1.68074e-11	1.99458e-11	1.45896e-10	1.21497e-11	2.74916e-11	1.51161e-11	4.29384e-11	1.97026e-11	4.8602e-11	1.00036e-11	1.60796e-11	1.24315e-11	1.9119e-11	1.6135e-11	2.81321e-11	2.33423e-11	2.11035e-11	1.76834e-11	1.6118e-11	1.42414e-11	1.93838e-11	1.84219e-11	2.04258e-11	2.07507e-11	1.85193e-11	2.82037e-11
1.242			1.76473e-11	1.92732e-11	2.109e-11	2.19248e-11	2.45128e-11	2.62033e-11	2.52782e-11	3.95423e-11	1.9963e-11	2.05765e-11	2.546e-11	1.89167e-11	2.10089e-11	2.00379e-11	1.40504e-11	1.40288e-11	1.7304e-11	1.78046e-11	1.64959e-11	2.03448e-11	3.69759e-11	1.88998e-11	1.77571e-11	1.65074e-11	1.76346e-11	5.17173e-11	2.11833e-11
1.296				1.63356e-11	1.76432e-11	1.56336e-10	1.80097e-11	1.48882e-11	1.85935e-11	7.90464e-11	1.72134e-11	1.71823e-11	1.68223e-11	9.06327e-11	2.96111e-11	2.57109e-11	1.62186e-11	1.78791e-11	2.20577e-11	1.42616e-11	1.64951e-11	1.77687e-11	5.91777e-11	1.98249e-11	1.76484e-11	1.71286e-11	4.42772e-11	5.0275e-11	1.34184e-10
1.35					2.19715e-11	2.12988e-11	1.67561e-11	1.17817e-11	1.95792e-11	1.75516e-11	1.23038e-11	1.78699e-11	1.77299e-11	1.26983e-11	2.00416e-11	2.086e-10	1.63008e-11	1.71849e-11	2.4507e-11	1.81854e-11	1.47395e-11	1.23692e-11	2.35088e-11	5.38481e-11	2.25266e-11	3.64143e-11	2.99807e-10	2.11428e-11	4.79664e-11
1.404							4.71523e-11	1.65735e-11	1.83676e-11	2.14842e-11	5.76902e-11	8.60694e-12	5.70527e-11	1.35163e-11	1.6467e-11	3.08087e-11	2.41549e-11	2.16867e-11	3.09221e-11	1.69708e-11	1.76487e-11	1.14828e-11	4.79098e-11	2.01866e-11	2.71203e-11	1.937e-11	4.43838e-10	2.03522e-11	1.3859e-11
1.458								1.32502e-11	1.46473e-11	2.82724e-11	1.48687e-11	3.19743e-11	1.92524e-11	1.32288e-11	1.19767e-11	1.92104e-11	1.21104e-11	2.20273e-11	2.04785e-11	1.24362e-11	1.76629e-11	2.06281e-11	2.26964e-11	4.50633e-11	3.60632e-11	4.94263e-11	3.09294e-11	1.80389e-11	2.13606e-11
1.512								2.27646e-11	1.66961e-11	1.97397e-11	2.4794e-11	2.35147e-11	1.16105e-11	1.9306e-11	1.76087e-11	2.78427e-11	1.00363e-10	1.76389e-11	1.7746e-11	1.3737e-11	1.70192e-11	1.48381e-11	1.33609e-11	4.13103e-11	1.90781e-11	4.1961e-11	1.92251e-11	2.28718e-11	1.76564e-11
1.566

## Sheet: D exp1 p3
Experiment 1, Parasite 3. Average 41.4 pN. Some multi peak curves.
Pixels	Size
28 x 28	1.5 x 1.5 um		1 pixel = 54 nm x 54 nm
	0	0.054	0.108	0.162	0.216	0.27	0.324	0.378	0.432	0.486	0.54	0.594	0.648	0.702	0.756	0.81	0.864	0.918	0.972	1.026	1.08	1.134	1.188	1.242	1.296	1.35	1.404	1.458	1.512	1.566
0
0.054									3.47687e-11	1.36825e-11	1.48689e-11	1.9544e-11	2.75527e-11	1.63485e-11	1.43669e-11	2.31509e-11	7.25294e-11	1.22682e-11	2.03346e-10	8.20248e-11	1.13481e-10	5.60583e-11	1.46427e-11	1.53064e-11	1.48033e-11	2.19065e-11
0.108							1.52748e-11	1.72772e-11	8.16521e-11	1.36736e-11	3.59025e-11	1.29582e-11	1.29627e-11	1.41513e-11	3.50078e-11	1.92482e-11	5.52509e-11	3.05489e-11	6.01149e-11	1.53433e-10	4.16092e-11	3.73386e-11	4.3116e-11	3.4807e-10	1.68767e-11	1.14769e-11	6.87137e-11
0.162								1.20363e-11	2.22582e-11	1.79638e-11	6.99157e-11	4.69459e-11	6.47778e-11	1.5365e-11	1.05056e-10	3.1303e-11	1.91543e-11	3.63535e-11	1.94554e-11	2.46246e-11	1.57204e-10	2.57039e-11	2.28245e-11	1.0486e-10	5.63134e-11	1.49073e-11	4.21688e-11
0.216							9.25659e-11	6.97213e-11	2.47107e-11	1.29625e-11	2.11325e-11	9.70557e-11	1.80215e-11	1.67469e-11	1.9349e-11	4.20137e-11	4.98728e-11	1.96416e-11	1.93358e-11	1.71168e-11	1.05585e-11	3.14737e-11	1.85076e-11	1.00435e-11	4.08388e-11	2.34108e-11
0.27				8.47856e-11	5.57164e-11	3.50857e-11	4.88833e-11	5.27747e-11	2.25502e-11	1.66536e-11	1.57003e-11	1.64553e-11	1.44572e-11	1.79268e-11	3.13483e-11	2.18849e-10	4.86563e-11	9.21197e-11	1.04752e-11	1.91462e-11	5.8721e-11	1.61893e-11	2.62758e-11	4.6003e-11	1.77368e-11	2.18054e-11
0.324			1.89705e-11	5.39824e-11	3.78611e-10	5.09995e-11	7.82688e-11	3.90458e-11	3.4103e-11	1.76181e-11	5.05567e-11	1.76368e-11	6.01452e-11	4.78994e-11	1.72629e-11	5.10801e-11	8.6979e-11	1.81609e-11	3.95444e-11	5.76666e-11	3.45459e-11	5.84476e-11	3.34734e-11	2.12104e-11	7.40191e-11	2.11188e-11
0.378		7.99774e-11	1.98232e-11	7.09335e-11	3.04921e-11	4.49884e-11	4.94559e-11	1.91522e-11	4.07022e-11	1.22292e-11	7.98362e-11	1.62216e-11	1.99928e-11	1.33293e-10	9.7299e-11	2.87502e-11	5.69442e-11	1.30292e-10	4.9016e-11	5.3206e-11	8.56327e-11	4.25608e-11	1.78907e-11	1.40971e-11	1.9408e-11	2.88148e-10	8.37868e-11
0.432		1.06693e-10	1.22637e-11	2.93448e-11	1.77918e-11	1.27441e-10	8.86791e-11	1.92378e-11	2.67271e-11	1.54695e-11	4.40798e-11	1.87627e-11	1.31557e-11	1.68979e-11	1.2653e-10	8.73207e-11	1.28902e-11	7.28083e-11	5.48352e-11	1.17393e-10	8.71343e-11	1.22507e-11	9.72201e-11	5.72731e-11	4.23722e-11	7.25198e-11	6.06806e-11	5.54325e-10
0.486		1.31171e-11	1.74878e-11	1.48184e-11	1.21251e-11	4.78886e-11	3.49852e-11	1.90363e-11	1.69702e-11	1.79337e-11	1.51488e-11	5.50991e-11	1.89825e-11	9.7072e-11	2.11537e-11	1.36718e-11	4.87443e-11	2.03452e-11	1.53803e-11	1.74471e-11	2.74528e-11	4.95377e-12	1.5181e-10	2.1401e-11	7.45476e-11	7.43406e-11	1.4897e-10	4.92272e-11	4.73607e-11
0.54		1.09873e-10	1.79737e-10	1.76936e-11	1.44697e-11	8.37503e-12	3.20512e-11	9.30978e-11	1.28682e-11	3.07787e-11	2.5301e-11	1.83704e-11	1.99273e-11	2.12394e-11	1.50628e-11	6.32748e-11	3.41617e-11	2.25385e-11	1.8125e-11	2.11809e-11	5.79507e-11	1.68116e-11	8.93417e-11	6.49385e-11	8.45299e-11	7.64764e-11	2.87461e-11	1.91249e-11	2.41608e-11
0.594		7.50003e-11	1.70669e-11	6.02626e-11	3.0654e-11	9.18759e-11	7.4546e-11	1.2518e-10	3.14999e-11	2.99482e-11	1.38605e-11	3.21991e-11	1.75127e-11	1.78682e-11	1.9517e-11	3.65301e-11	1.24478e-11	1.79426e-11	6.96561e-11	1.83979e-10	4.25484e-11	1.7207e-11	1.92628e-11	4.73117e-11	4.76159e-11	6.00299e-11	1.71416e-11	3.25873e-11	1.45313e-11
0.648		3.72599e-11	3.17567e-11	1.16771e-11	1.08081e-11	5.63089e-11	1.07552e-10	9.6175e-11	6.10628e-11	1.77213e-11	3.22416e-11	1.06558e-11	1.49996e-11	3.23443e-11	1.50538e-11	6.47134e-11	1.68458e-11	2.45329e-11	1.69592e-11	1.47768e-11	1.73543e-11	3.51038e-11	1.22613e-11	1.88629e-10	6.54273e-11	1.71585e-11	2.23193e-11	3.04974e-11	4.00508e-11
0.702		6.68979e-11	8.52585e-11	7.43797e-11	1.71319e-11	1.78322e-11	1.7833e-11	5.50667e-11	3.93406e-11	2.68088e-11	2.16382e-11	1.62484e-11	2.11028e-11	1.84489e-11	1.58e-11	6.58339e-11	1.04889e-10	5.30943e-11	2.6216e-11	2.26367e-11	1.32267e-11	3.03429e-11	1.58884e-11	1.86504e-11	2.55494e-11	3.93185e-11	1.75361e-11	1.57506e-11	3.06968e-11
0.756		1.26311e-11	1.50205e-11	1.545e-11	4.17364e-11	1.33085e-11	1.09025e-10	1.71134e-11	2.73754e-10	1.334e-11	1.50527e-11	2.29949e-11	5.57177e-11	1.59484e-11	1.16348e-11	3.67858e-11	1.0666e-10	1.64165e-11	1.95776e-11	4.59162e-11	2.63982e-11	8.42556e-11	1.54383e-11	7.52067e-11	8.36875e-11	2.18001e-11	1.7037e-11	9.16895e-12	1.54555e-11
0.81		4.05875e-11	1.28799e-11	1.70333e-11	2.03175e-11	5.12843e-11	1.56057e-11	2.77666e-11	1.79902e-11	1.65892e-11	2.73022e-11	1.79817e-11	1.34865e-11	1.92562e-11	6.75326e-11	4.50731e-11	3.61223e-10	1.69729e-11	1.17635e-10	2.12396e-10	3.26036e-11	1.5066e-11	7.62723e-11	1.6697e-11	2.79148e-11	3.70953e-11	1.71414e-11	4.40943e-11	1.65704e-11
0.864		1.51047e-11	2.24694e-11	1.09728e-11	1.67712e-11	1.30039e-11	8.98602e-11	1.16422e-11	5.36483e-11	1.80752e-11	1.73037e-11	1.87222e-11	2.47292e-11	1.51966e-11	1.46506e-11	5.2143e-11	1.78662e-10	1.50674e-11	6.16641e-11	4.31724e-11	6.36423e-11	1.30452e-11	2.03725e-11	5.71406e-11	4.2632e-10	1.83373e-11	1.8865e-11	1.55641e-11	1.7846e-11
0.918		1.09109e-11	1.48444e-11	1.78554e-11	1.43026e-11	3.6124e-11	3.16812e-11	1.5944e-11	1.79319e-11	1.24259e-11	2.8743e-11	1.21068e-11	1.78011e-11	3.69281e-11	1.69403e-11	3.11077e-11	5.39383e-11	6.74924e-11	4.60799e-11	8.11109e-11	9.64748e-12	1.49921e-11	4.23181e-11	1.75561e-11	5.51121e-11	1.88854e-11	2.35105e-11	1.24063e-11	1.74677e-11
0.972		1.20921e-11	1.89629e-11	1.83174e-11	1.77692e-11	1.52881e-11	1.43996e-11	1.43164e-11	1.4084e-11	9.16665e-11	1.80272e-11	1.55043e-11	1.63213e-11	1.93213e-11	2.28135e-11	8.37587e-11	3.32625e-11	1.58718e-11	4.16395e-11	2.14873e-11	6.39121e-11	1.74041e-11	1.6569e-11	2.98014e-11	6.03931e-11	1.96076e-11	1.29884e-10	7.37921e-11	2.20513e-11
1.026		1.49911e-11	3.18798e-10	1.46918e-11	1.34685e-11	2.14618e-11	2.23739e-11	1.61665e-11	1.94921e-11	3.46215e-11	1.46169e-11	1.69491e-11	5.88211e-11	5.09054e-11	5.16205e-11	5.01305e-11	9.96025e-11	1.24044e-10	2.59184e-11	1.757e-11	3.2207e-11	7.18002e-11	1.27771e-11	1.21302e-11	1.97428e-11	2.17498e-11	2.03154e-11	1.20251e-11	4.0624e-11
1.08		9.39684e-11	8.96409e-12	1.55591e-11	1.35594e-11	1.25494e-11	1.5664e-11	2.28738e-11	1.48495e-11	2.77781e-11	1.50146e-11	5.45512e-11	1.50985e-11	1.47509e-11	6.24558e-11	2.13628e-11	1.40568e-10	6.54196e-11	2.91521e-11	2.14739e-11	2.73392e-11	4.17657e-11	3.59687e-11	1.57095e-11	3.71261e-11	1.39187e-11	1.60643e-11	1.74628e-10	7.58689e-11
1.134		4.17362e-11	2.18007e-11	1.95279e-11	1.71305e-11	5.84799e-11	1.98958e-11	4.8854e-11	2.38432e-11	9.49346e-11	1.44956e-11	1.45434e-11	4.82266e-11	4.02475e-11	1.23181e-11	1.67978e-11	2.55638e-11	8.77053e-11	1.00761e-10	1.62125e-11	3.98118e-11	3.59796e-11	1.52278e-11	1.61181e-11	5.33558e-11	2.6552e-11	3.72135e-11	4.38373e-11	6.15191e-11
1.188		1.96354e-11	1.84905e-11	3.12354e-11	4.31193e-11	1.19414e-11	1.52234e-11	2.60969e-11	2.5813e-11	5.17746e-11	3.39188e-11	1.341e-10	2.27894e-11	1.29482e-11	2.37766e-11	1.228e-11	1.648e-11	1.98757e-11	1.39081e-11	7.93968e-11	2.0519e-11	5.14119e-11	1.71795e-11	1.65809e-11	2.72953e-11	5.76503e-11	5.49381e-11	2.46124e-11	4.39011e-11
1.242		7.99764e-11	8.31433e-11	3.23595e-11	3.40318e-11	2.09046e-11	1.44988e-11	1.61108e-11	1.66246e-11	7.66021e-11	5.37716e-11	1.26185e-11	1.08443e-11	2.012e-11	3.05684e-11	1.66191e-11	9.31102e-12	7.64666e-11	2.61616e-11	1.54662e-11	1.33447e-11	1.4465e-11	9.15355e-11	1.14907e-11	2.61243e-11	3.95196e-11	3.62616e-11	1.8987e-11	1.08162e-11
1.296		1.58407e-11	3.23011e-11	8.71944e-11	1.70694e-11	2.13212e-11	7.23126e-11	4.43402e-11	1.08397e-11	2.47488e-11	6.24122e-11	1.4616e-11	1.14733e-11	1.42367e-11	1.58636e-11	1.76244e-11	1.0796e-10	2.439e-11	3.17404e-11	3.21914e-11			1.67561e-11	2.54308e-11	9.01691e-11	4.23233e-11	1.71553e-11	2.05163e-11	2.0094e-11
1.35		1.21304e-11	6.42821e-11	2.95703e-11	1.70594e-11	2.50498e-11	6.62435e-12	2.25546e-11	2.02137e-11	2.58724e-11	1.6965e-11	1.54273e-11	1.42542e-11	2.05322e-11	8.32893e-11	2.29482e-11	1.72104e-11	1.35415e-11	1.44849e-11	3.7601e-11							1.24439e-10	1.89438e-11	1.69137e-11
1.404				2.30378e-11	1.69272e-11	1.05755e-11	1.56824e-11	1.31032e-11	1.57497e-11	1.54346e-11	1.36327e-11	1.53707e-11	7.16101e-11	7.14923e-11	2.60487e-11	1.65853e-11	1.55159e-11	3.03165e-11	1.49099e-11								1.65212e-11	1.51171e-11	1.52418e-11
1.458

## Sheet: D exp1 p4
Experiment 1, Parasite 4: Average force 35 pN.
Pixels	Size
28 x 28	1.5 x 1.5 um		1 pixel = 54 nm x 54 nm
	0	0.054	0.108	0.162	0.216	0.27	0.324	0.378	0.432	0.486	0.54	0.594	0.648	0.702	0.756	0.81	0.864	0.918	0.972	1.026	1.08	1.134	1.188	1.242	1.296	1.35	1.404	1.458	1.512	1.566
0
0.054										1.66845e-11	1.5363e-11	1.51103e-11	8.93568e-11	4.90783e-11	2.12014e-11	1.31968e-11	1.29801e-10	1.13288e-11	1.38697e-11	8.7936e-11	6.81901e-11	1.53197e-11	1.33954e-11	5.19448e-11	8.21967e-11	7.14196e-11	1.55299e-11	7.41121e-10
0.108									5.12799e-11	1.50593e-11	9.93912e-12	2.42685e-11	2.13627e-11	1.68165e-11	6.65619e-11	4.20228e-11	1.33409e-11	1.67642e-11	1.50495e-11	1.25572e-11	1.32359e-11	1.52926e-11	6.15636e-11	3.62027e-11	5.39399e-10	1.08227e-10	1.88964e-11	8.20625e-11	1.22776e-11
0.162									1.06338e-10	9.94699e-12	3.30203e-11	5.2912e-11	6.23471e-11	6.71244e-11	1.61851e-11	1.50552e-11	1.51214e-11	1.25365e-11	1.39075e-10	1.13424e-11	1.37771e-11	1.40134e-11	1.58202e-11	2.70674e-11	1.42853e-11	1.75552e-11	5.55057e-11	1.2877e-11	1.40294e-11
0.216								4.89652e-12	1.73745e-11	3.24252e-11	8.80906e-11	3.87545e-11	4.35443e-11	7.85021e-11	3.47935e-11	5.35959e-11	1.22625e-11	3.90723e-11	1.61486e-11	4.31234e-11	1.31151e-10	9.70055e-12	2.11622e-11	7.24899e-11	1.81457e-11	1.85949e-11	1.05575e-11	8.12546e-12	7.92156e-11
0.27					1.66612e-11	1.94434e-11	3.76952e-11	2.7523e-11	9.66336e-11	2.62006e-11	6.37165e-11	1.62385e-10	3.25162e-11	1.15753e-11	1.71344e-11	6.31186e-11	4.05728e-11	1.04587e-11	2.49626e-11	8.02386e-11	5.00421e-11	3.57e-11	2.54013e-11	5.79784e-11	1.90064e-11	1.25138e-11	4.12272e-11	1.30852e-11	1.6689e-11
0.324				2.20644e-11	3.15956e-11	1.26817e-10	1.63424e-11	7.1066e-11	7.17807e-11	2.79501e-11	2.04712e-11	1.32422e-11	1.4271e-11	3.88086e-11	1.63628e-11	2.32502e-11	2.6517e-11	1.08273e-09	2.76746e-11	3.32034e-11	2.45252e-11	5.03932e-11	1.80875e-11	1.90462e-11	2.0946e-11	1.34278e-11	1.40983e-11	1.18479e-11	1.79688e-11
0.378		8.10221e-11	1.322e-10	4.4892e-11	5.68914e-11	1.31628e-11	1.55057e-11	5.1621e-11	6.51717e-11	3.16214e-11	7.55017e-11	1.63827e-11	4.44092e-11	1.44519e-11	6.37546e-11	2.23846e-11	4.04183e-11	1.88421e-11	7.89386e-11	7.09522e-11	4.60587e-11	2.12055e-11	2.19896e-11	3.53707e-11	1.03519e-11	1.31794e-11	9.19824e-12	1.70589e-11	1.44213e-11
0.432		4.79006e-11	2.08473e-11	5.71737e-11	9.32314e-11	2.40435e-11	6.53281e-11	2.47556e-11	5.2236e-11	3.97752e-11	6.12582e-11	1.98341e-10	1.27455e-10	1.08066e-10	6.90927e-11	7.13016e-11	2.1529e-11	3.88372e-10	1.55036e-11	2.02392e-11	4.80203e-11	1.30687e-11	1.10621e-11	1.26409e-11	3.47653e-11	1.63702e-11	6.50216e-11	1.70223e-11	1.5297e-11
0.486		2.73504e-11	1.69973e-11	5.47547e-11	2.0186e-11	6.42765e-11	1.80351e-10	5.38276e-11	7.63961e-11	5.37754e-11	4.05932e-11	4.11158e-11	3.35279e-11	5.05698e-11	5.63377e-11	1.29848e-11	1.22206e-11	6.97327e-11	1.29964e-11	1.36159e-11	5.51878e-11	1.31206e-11	1.9173e-11	2.09203e-11	7.38121e-12	1.9242e-11	1.14824e-11	1.2402e-11	1.09214e-11
0.54		1.5282e-11	1.32431e-11	1.25668e-10	1.68567e-11	2.06246e-11	1.02897e-10	1.50501e-11	1.85839e-11	2.04998e-11	6.38991e-11	1.5247e-10	5.37621e-11	8.36724e-11	4.60881e-11	3.3681e-11	9.42395e-11	2.12487e-11	5.29392e-11	1.68105e-11	1.91982e-11	2.09318e-11	1.93356e-11	1.8416e-11	2.54501e-11	1.2389e-11	1.60345e-11	1.74108e-11	1.41313e-11
0.594		1.18551e-10	1.11243e-11	2.40878e-11	1.63994e-11	1.52958e-11	2.01511e-11	4.80578e-11	1.02662e-11	8.50324e-11	1.51306e-11	8.09957e-11	1.29857e-11	1.90878e-11	6.85155e-12	6.21716e-11	2.91129e-11	5.50986e-11	1.50488e-11	3.74972e-11	1.70282e-11	1.0195e-11	5.97116e-11	2.02962e-11	3.429e-11	1.17064e-09	1.645e-11	2.40409e-11	2.9914e-10
0.648		1.45265e-11	1.86198e-11	1.3921e-11	3.95539e-11	4.79623e-11	9.20553e-12	2.7526e-11	5.61948e-11	1.44672e-11	3.08497e-11	1.81418e-11	1.7516e-11	1.697e-11	1.6405e-11	1.63136e-11	1.83488e-11	2.81975e-11	2.21336e-11	9.5767e-12	3.14171e-11	2.33139e-11	1.27282e-11	8.23973e-11	1.29723e-11	1.33284e-11	2.94019e-11	2.08326e-11	2.64735e-11
0.702		1.10101e-11	1.5494e-11	2.56971e-11	7.02857e-11	2.87337e-11	7.0571e-11	1.78926e-11	2.92387e-11	3.12957e-11	1.01396e-11	8.4043e-12	1.32581e-11	1.63368e-11	5.07117e-11	7.48978e-11	1.7634e-11	4.8205e-11	2.49455e-11	1.53519e-11	4.2603e-11	2.23521e-11	2.16065e-11	1.70926e-11	3.18623e-11	1.77503e-11	2.1098e-11	1.31129e-11	1.10278e-11
0.756		1.74127e-11	1.48171e-11	1.3427e-11	1.46863e-11	5.58638e-11	8.58685e-11	9.22105e-11	4.05387e-11	2.02488e-11	2.11396e-11	1.58067e-11	1.01165e-11	1.31446e-11	1.6224e-11	1.31898e-11	4.468e-11	1.24235e-11	1.30237e-11	3.0549e-11	6.05746e-11	6.48115e-11	6.32464e-11	6.12234e-11	1.52925e-11	1.51847e-11	1.62226e-11	1.07796e-11	1.25927e-11
0.81		5.90439e-11	2.05059e-11	4.30338e-11	1.61921e-11	1.59127e-11	1.52988e-11	1.57212e-11	1.65536e-11	1.34992e-11	1.46932e-11	1.25917e-11	2.51681e-11	1.75325e-11	1.57904e-11	4.4587e-11	2.84902e-11	4.5033e-11	1.42482e-11	1.09716e-11	1.42001e-11	3.73515e-11	1.32242e-11	1.65541e-11	5.77313e-11	1.99497e-11	1.37498e-11	1.46559e-11	1.57238e-11
0.864		1.60528e-11	1.60185e-11	3.71485e-11	1.27292e-11	2.17886e-11	3.37065e-11	1.50676e-11	1.15626e-11	2.15906e-11	1.44769e-11	6.952e-11	3.02791e-11	1.30733e-11	1.77519e-11	1.11045e-11	1.67407e-11	1.26799e-11	2.11866e-11	1.20064e-11	1.31579e-11	1.31015e-11	1.13953e-11	1.86365e-11	1.80763e-11	6.99534e-11	1.90596e-11	2.90261e-11	1.2048e-11
0.918		1.59926e-11	1.62428e-11	1.43342e-11	2.19154e-10	2.37154e-11	7.10602e-11	1.2239e-11	1.94829e-11	1.52448e-11	4.89735e-11	3.78555e-11	1.54655e-11	1.55775e-11	1.44714e-11	6.26738e-11	2.86232e-11	1.37333e-11	1.69419e-11	1.47918e-11	1.28293e-11	1.33779e-11	2.12864e-11	1.36565e-11	3.84777e-11	5.24592e-11	1.36863e-11	2.1627e-10	2.10732e-11
0.972		1.64754e-11	1.97325e-11	1.34393e-11	1.10106e-11	1.01438e-10	1.64135e-11	1.89042e-11	2.56025e-11	2.72246e-11	1.4419e-11	1.58613e-11	1.76718e-11	1.61934e-11	1.09508e-11	1.67582e-11	2.05598e-11	1.11222e-11	8.98677e-12	1.52685e-11	1.45205e-11	1.67153e-11	1.65464e-11	1.53411e-11	1.31155e-11	1.31513e-11	7.33142e-11	1.53309e-11	1.49286e-11
1.026		2.0993e-11	1.40633e-11	1.76447e-11	1.28038e-11	2.00693e-11	1.11486e-11	1.43719e-11	1.1894e-11	1.38488e-11	1.47508e-11	1.67731e-11	1.96002e-11	1.22543e-11	1.76515e-11	1.25016e-11	7.64007e-11	1.18187e-11	1.71174e-11	1.33269e-11	1.1516e-11	1.1413e-11	1.36198e-11	1.45723e-11	3.61233e-11	1.5936e-11	1.76812e-11	1.5216e-11	1.1928e-11
1.08		6.66838e-11	2.85224e-11	4.37228e-11	1.96044e-11	1.94694e-11	1.35377e-11	1.43825e-11	8.67663e-11	1.96388e-11	5.83811e-11	3.59231e-11	2.17221e-11	1.44612e-11	2.52567e-11	1.38634e-11	1.44382e-11	2.08385e-11	1.41778e-11	1.66071e-11	3.32807e-11	1.73487e-11	1.33979e-11	1.5415e-11	1.4448e-11	1.09518e-11	1.16075e-11	7.59197e-11	1.63528e-11
1.134		1.24885e-11	1.27402e-11	1.71974e-11	3.70429e-11	1.76052e-11	2.03173e-11	1.66938e-11	8.6164e-12	1.65472e-11	1.52069e-11	1.88008e-11	1.91117e-11	1.49743e-11	6.7574e-11	4.65108e-11	1.98896e-11	3.2198e-11	1.7929e-11	2.02242e-11	1.12969e-11	1.22386e-11	5.6578e-11	5.31522e-11	1.25194e-11	1.70908e-11	5.36174e-11	5.75566e-11	3.73218e-11
1.188		4.23199e-11	1.90856e-11	1.38386e-11	5.28839e-11	1.3134e-11	1.24025e-11	1.62963e-11	1.35817e-11	1.51791e-11	1.34979e-11	1.64135e-11	1.79521e-11	1.617e-11	1.77748e-11	1.49608e-11	7.77853e-12	4.13644e-11	3.79766e-11	1.41347e-11	1.35089e-11	1.44233e-11	9.37841e-12	1.84229e-11	1.17045e-11	1.68837e-11	1.71811e-11	2.35128e-11	6.31012e-11
1.242		2.79372e-11	2.59712e-11	2.45118e-11	1.55508e-11	1.19491e-11	2.95716e-11	1.42454e-11	1.26056e-11	1.49231e-11	1.69557e-11	1.52561e-11	2.99194e-11	3.82677e-11	4.79517e-11	1.70975e-11	4.81942e-11	1.1249e-11	1.73747e-11	1.51125e-11	1.0382e-10	1.92085e-11	1.72965e-11	1.48716e-11	1.04469e-11	1.47543e-11	1.77873e-11	1.36317e-11	1.30788e-11
1.296		1.45496e-11	1.01437e-11	3.78964e-11	3.52199e-11	3.18901e-11	1.5075e-11	1.93972e-11	2.08611e-11	1.35697e-11	1.09362e-10	1.55816e-11	9.14837e-12	1.44179e-11	4.53981e-11	1.2355e-11	1.4354e-11	1.65019e-11	1.45333e-11	1.53536e-11	1.45698e-11	2.07713e-11	4.15397e-11	1.59002e-11	1.4567e-11	2.98487e-10	1.4976e-11	1.87271e-11	1.17805e-11
1.35		1.58479e-11	9.77791e-11	2.03332e-11	1.66768e-11	1.64627e-11	1.97177e-11	1.48936e-11	1.93501e-11	1.24257e-11	2.51974e-11	2.02591e-11	6.3254e-11	2.11757e-11	2.23555e-11	1.20818e-10	2.03529e-11	1.35026e-11	1.76555e-11	1.08234e-11	1.69918e-11	2.07106e-11	1.50891e-11	1.55712e-11	1.77564e-11	1.65209e-11	1.6745e-11	1.59869e-11	1.30995e-11
1.404		3.05091e-11	1.73481e-11	4.58675e-11	2.29816e-11	1.43834e-11	1.16302e-11	1.90056e-11	1.60651e-11	2.52578e-11	3.43309e-11	1.67008e-11	1.25763e-11	1.83432e-11	1.25498e-11	2.72905e-11	1.4637e-11	2.2e-11	1.72431e-11	1.61957e-11	1.76342e-11	1.50179e-11	1.83507e-11	2.6273e-11	1.366e-11	1.55894e-11	1.78361e-11	2.07894e-11	1.25395e-11
1.458		1.69537e-11	1.38835e-11	1.70964e-11	1.21126e-11	1.01546e-11	1.03262e-11	2.63059e-11	1.55084e-11	5.59763e-11	1.82669e-11	1.40274e-11	2.60562e-11	3.79327e-11	1.76799e-11	4.15222e-11	6.52609e-11	2.53192e-11	1.06565e-11	1.51057e-11	3.75274e-11	1.16875e-11	1.41724e-11	1.96966e-11	1.61418e-11	5.50926e-11	1.75104e-11	1.40308e-11	1.93318e-11
1.512		1.54273e-11	5.15846e-11	1.76871e-11	4.11849e-11	2.10752e-11	1.24067e-11	1.55046e-11	1.61275e-11	6.55158e-11	1.61219e-11	1.57376e-11	1.98499e-11	3.01883e-11	2.9435e-11	1.58952e-11	1.36172e-11	1.98132e-11	1.46082e-11	1.2095e-11	9.24585e-12	1.33141e-11	1.05761e-11	2.5749e-11	1.32249e-11	7.0469e-11	2.78678e-11	1.26558e-11	6.08677e-11
1.566

## Sheet: D exp1 p5
Experiment 1, Parasite 5: Average force 33 pN. Quite a few long plateau events. More multiple peak events.
Pixels	Size
28 x 28	1.5 x 1.5 um		1 pixel = 54 nm x 54 nm
	0	0.054	0.108	0.162	0.216	0.27	0.324	0.378	0.432	0.486	0.54	0.594	0.648	0.702	0.756	0.81	0.864	0.918	0.972	1.026	1.08	1.134	1.188	1.242	1.296	1.35	1.404	1.458	1.512	1.566
0
0.054		4.02106e-11	1.40593e-11	1.34745e-11	3.70002e-10	1.48722e-11	1.77992e-11	5.13238e-11	1.78727e-11	4.35933e-11	1.47859e-11	4.74929e-11	2.38753e-11	4.10502e-11	2.67791e-11	6.25184e-11	2.25825e-11	5.3381e-11	2.60785e-11	1.3884e-11	1.42894e-11	1.75946e-11	4.30001e-11	1.53899e-11	1.56392e-11	1.28704e-11	1.47821e-11	1.36401e-11	4.27995e-11
0.108		7.13711e-11	7.42468e-11	2.48255e-11	1.17384e-11	2.56216e-11	1.40796e-11	5.32953e-11	1.57473e-11	1.3868e-11	1.70476e-11	2.31515e-11	1.50581e-11	5.49662e-11	3.33094e-11	5.80919e-11	4.7959e-11	6.88044e-11	1.42324e-11	1.11791e-11	1.65884e-11	1.30552e-11	1.63849e-11	3.03402e-11	1.76058e-11	1.58128e-11	1.89029e-11	3.95998e-11	1.44252e-11
0.162		2.06841e-11	1.36961e-11	1.75525e-11	1.34755e-11	1.73858e-11	3.57579e-11	1.56648e-11	1.81895e-11	2.22911e-11	3.50226e-11	6.43779e-11	3.22909e-11	4.8269e-11	1.10321e-10	6.41873e-11	2.3698e-11	2.38125e-11	4.05255e-11	1.43879e-11	4.24996e-11	1.21486e-11	1.73592e-11	1.97722e-11	1.07551e-11	1.62203e-11	2.22683e-11	1.59663e-11	4.75743e-11
0.216		1.51657e-11	1.68153e-11	3.89517e-11	1.68435e-11	2.42397e-11	2.21308e-11	2.37017e-11	4.61713e-11	4.32475e-11	2.80349e-11	3.95342e-11	6.75194e-11	7.06656e-11	2.72067e-11	6.81301e-11	5.71699e-11	5.35264e-11	3.63943e-11	1.5277e-11	1.40289e-11	1.26904e-11	1.74524e-11	1.78179e-11	1.28448e-11	1.6916e-11	1.41743e-11	1.78311e-11	1.48432e-10
0.27		1.85047e-11	3.56339e-11	6.16704e-11	3.91152e-11	1.30083e-11	4.97019e-11	1.27824e-11	1.42202e-11	4.82493e-11	2.3103e-11	7.60375e-11	5.85512e-11	4.67008e-11	9.11244e-11	5.39067e-11	1.74258e-11	1.75754e-11	1.26467e-11	1.42952e-11	1.80266e-11	1.61516e-11	2.64071e-11	5.25362e-11	2.04135e-11	1.40502e-11	2.3699e-11	2.22592e-11	6.23613e-11
0.324		1.74049e-11	5.67213e-11	3.38832e-11	3.75857e-11	2.68285e-11	2.30236e-11	4.46147e-11	3.54567e-11	3.22276e-11	4.5073e-11	1.22828e-11	9.51349e-12	1.74242e-11	4.02645e-11	1.91782e-11	1.85113e-11	7.28975e-11	4.2025e-11	6.04144e-11	1.41877e-11	1.21518e-11	1.54357e-11	1.67248e-11	1.15952e-11	1.9232e-11	5.38705e-11	2.07991e-10	6.25626e-11
0.378		2.75786e-11	2.99483e-11	2.22448e-11	1.11557e-11	2.5394e-11	5.76157e-11	2.12786e-11	5.65035e-11	3.79458e-11	1.5343e-11	6.24879e-11	1.63407e-11	1.56993e-11	2.24041e-11	1.73554e-11	2.37789e-11	2.30753e-11	1.70566e-11	1.43795e-11	2.93278e-11	1.37935e-11	1.69762e-11	2.05488e-11	1.68835e-11	1.75419e-11	1.12186e-11	1.92571e-11	2.07693e-11
0.432		3.90715e-11	2.06692e-11	2.55865e-11	1.92001e-11	3.6734e-11	1.53851e-11	4.58618e-11	6.01784e-11	3.06202e-11	3.41292e-11	6.42107e-11	1.59492e-11	1.21811e-11	1.51513e-11	1.83942e-11	3.65481e-11	1.62864e-11	6.36956e-11	1.20271e-11	1.56514e-11	1.62704e-11	2.52283e-11	1.48119e-11	6.32902e-11	1.63631e-11	1.77347e-11	1.3435e-11	1.61905e-11
0.486		8.21339e-11	6.27698e-11	5.2614e-11	1.54367e-11	3.16268e-11	3.45404e-11	4.22243e-11	3.57923e-11	3.62472e-11	1.54777e-11	1.46293e-11	1.95836e-11	3.62488e-11	7.11333e-11	1.96417e-11	2.4922e-11	2.77647e-10	1.39022e-11	1.49248e-11	2.07821e-11	1.78279e-11	1.75877e-11	4.40086e-11	2.50216e-11	1.64158e-11	1.48269e-11	1.27729e-11	2.48288e-11
0.54		2.23791e-11	2.61026e-11	2.47582e-11	4.59519e-11	2.62622e-11	5.03043e-11	3.96408e-11	3.04762e-11	1.19022e-10	2.1848e-11	1.80282e-11	1.33487e-11	3.17897e-11	7.25917e-11	1.46542e-11	1.84922e-11	1.25785e-11	8.38954e-12	1.47528e-11	3.3001e-11	4.96891e-11	2.4569e-11	1.99075e-11	2.13819e-11	9.92322e-11	4.31782e-11	1.9933e-11	1.33503e-11
0.594		1.00726e-10	1.74897e-11	2.72728e-11	3.54081e-11	8.37762e-11	4.5946e-11	2.12636e-11	3.80816e-11	4.68121e-11	1.96907e-11	1.58145e-11	3.38581e-11	1.20213e-11	4.5238e-11	2.11369e-11	2.14517e-11	1.64611e-11	1.48412e-11	1.29228e-10	1.76713e-11	3.29472e-11	4.89177e-11	8.59399e-11	3.93606e-11	3.97841e-11	6.72412e-11	2.33256e-11	8.59737e-11
0.648		1.12858e-11	1.2718e-11	1.72388e-11	1.64728e-11	7.51332e-11	1.43166e-11	2.27403e-11	5.38385e-11	2.99755e-11	2.73426e-11	1.54704e-11	4.61915e-11	1.95085e-11	2.78805e-11	5.28366e-11	2.02005e-11	1.6499e-11	1.47763e-11	7.4806e-11	1.90957e-11	4.04073e-11	1.59865e-11	3.24774e-11	6.40871e-11	1.24038e-11	9.77564e-11	2.1726e-11	2.97752e-11
0.702		2.1152e-11	1.6109e-11	1.56334e-11	4.9737e-11	1.72116e-11	2.1431e-11	3.66685e-11	4.29599e-11	6.19729e-11	2.44506e-11	6.19874e-11	1.62065e-11	3.78126e-11	2.28777e-11	1.74156e-11	4.60115e-11	1.75121e-11	2.8045e-11	2.06846e-11	1.00227e-11	3.58221e-11	1.0737e-11	2.02366e-11	2.10043e-11	1.52594e-11	8.88281e-11	8.96564e-11	1.28901e-11
0.756		4.30675e-11	3.31163e-11	1.75696e-11	1.4267e-11	4.68206e-11	2.14352e-11	4.59034e-11	4.57665e-11	4.5734e-11	5.48126e-11	4.64941e-11	1.91213e-11	1.46319e-11	2.70932e-11	1.8041e-11	2.15247e-11	2.06213e-11	2.95722e-11	1.46015e-11	1.51673e-11	1.69826e-11	1.83608e-11	3.6066e-11	1.30408e-11	4.12063e-11	2.45039e-11	5.40511e-11	2.0618e-10
0.81		4.52237e-11	4.94786e-11	1.53217e-11	5.07918e-11	3.6686e-11	3.50326e-11	2.95019e-11	3.3377e-11	3.02791e-11	1.72793e-11	6.57674e-11	4.18119e-11	3.59909e-11	1.62278e-11	2.11241e-11	2.95845e-11	1.86041e-11	1.73991e-11	1.67093e-11	1.49041e-11	2.74037e-11	4.23956e-11	1.78658e-11	1.09549e-11	1.34575e-10	5.52732e-11	3.76134e-11	5.50168e-11
0.864		3.70009e-11	4.3948e-11	3.02708e-11	1.75132e-11	2.19248e-11	1.1225e-11	1.78088e-11	1.50437e-11	1.32821e-11	2.0054e-11	1.48696e-11	5.05354e-11	5.61034e-11	3.54934e-11	5.20072e-11	1.98388e-11	5.71858e-11	1.94973e-11	1.33258e-11	1.76905e-11	1.12382e-11	1.7193e-11	1.81497e-11	6.36204e-12	7.58373e-11	3.2765e-11	3.05705e-11	2.62175e-11
0.918		5.629e-11	3.41292e-11	1.35543e-11	1.87165e-11	1.59253e-11	2.13558e-11	1.13784e-11	1.26051e-11	2.78259e-11	5.13489e-11	4.00522e-11	2.34844e-11	1.80959e-11	6.24854e-11	4.67599e-11	5.52421e-11	2.13909e-11	1.27249e-11	2.12077e-11	1.11642e-11	5.0405e-11	1.92321e-11	7.7112e-11	4.67178e-11	1.02792e-10	4.513e-11	2.44906e-11	1.79568e-11
0.972		1.05984e-10	5.28083e-11	4.06241e-11	2.24711e-11	2.96569e-11	2.74632e-11	2.3373e-11	5.73036e-11	2.28499e-11	2.86278e-11	4.09427e-11	1.95277e-11	1.46378e-11	6.11771e-11	5.39946e-11	2.55495e-11	1.55625e-11	1.33977e-11	1.21864e-11	5.31632e-11	1.30467e-11	1.13858e-11	1.46761e-11	4.88408e-11	2.68481e-11	3.67717e-11	1.2204e-11	1.13533e-11
1.026		7.11801e-11	9.11834e-11	4.42202e-11	4.25854e-11	4.72954e-11	3.91407e-11	1.92736e-11	1.32859e-11	1.5765e-11	4.14002e-11	2.84856e-11	1.46447e-11	1.61122e-11	5.47734e-11	3.09162e-11	1.80165e-11	4.75115e-11	1.44439e-11	2.1334e-11	2.16983e-11	1.37002e-11	1.97573e-11	1.48232e-11	1.47237e-11	1.80287e-11	1.70028e-11	1.09533e-11	1.84868e-11
1.08		7.45445e-11	5.50754e-11	8.07192e-11	2.40876e-11	2.60696e-11	8.5664e-11	1.55183e-11	2.76301e-11	3.26884e-11	2.01775e-11	3.50594e-11	4.36076e-11	5.50579e-11	6.72735e-11	3.94251e-11	1.28746e-11	1.13752e-11	1.3818e-11	7.60493e-12	1.57974e-11	1.78743e-11	1.28234e-11	1.89433e-11	1.69884e-11	2.77537e-11	1.89854e-11	1.46532e-11	1.30669e-11
1.134		6.14328e-11	9.59577e-11	8.52911e-11	6.11914e-11	2.25191e-11	2.47266e-11	2.57717e-11	5.55485e-11	3.03063e-11	3.25919e-11	4.27989e-11	2.6356e-11	3.95705e-11	3.27965e-11	4.48529e-11	1.62326e-11	1.4453e-11	2.0838e-11	1.48594e-11	1.3964e-11	1.31404e-11	2.08996e-11	2.30774e-11	1.66194e-11	1.42058e-11	1.4039e-11	1.0949e-11	1.87271e-11
1.188		5.34496e-11	1.52434e-11	4.56776e-11	6.18677e-11	1.43874e-11	4.29869e-11	1.16255e-11	2.59815e-11	1.47751e-11	1.28228e-10	1.63252e-11	2.59757e-11	2.47771e-11	4.68947e-11	1.75393e-11	1.99704e-11	1.48173e-11	1.90136e-11	5.66213e-11	4.6155e-11	1.37141e-11	1.24693e-11	1.76527e-11	2.23555e-11	1.01826e-10	1.8824e-11	1.10657e-11	1.47427e-11
1.242		1.56898e-11	6.08206e-11	2.4481e-11	4.40945e-11	5.55079e-11	1.39682e-11	1.48332e-11	1.15919e-11	2.44414e-11	2.65452e-11	4.96373e-11	3.25014e-11	5.71299e-11	4.13933e-11	1.58251e-11	4.80173e-11	1.90935e-11	3.01151e-11	2.81436e-11	1.45179e-11	2.1236e-11	1.48625e-11	1.75291e-11	1.48716e-11	2.20499e-11	2.03695e-11	1.51342e-11	1.61783e-11
1.296		1.66891e-11	2.78594e-11	2.01494e-11	5.63118e-11	2.10427e-11	1.23932e-11	1.50745e-11	5.24445e-11	4.46074e-11	5.12371e-11	4.31936e-11	3.26309e-11	7.6436e-11	1.65197e-11	1.35351e-11	4.17347e-11	3.24375e-11	4.36741e-11	4.83393e-11	1.88139e-11	1.16793e-11	1.7601e-11	1.63253e-11	1.34851e-11	1.67535e-11	4.61633e-11	1.20213e-11	2.79971e-11
1.35		2.30332e-11	2.29016e-11	5.65844e-11	1.07615e-11	4.74101e-11	4.82348e-11	1.57302e-11	4.78945e-11	2.21392e-11	4.7828e-11	4.79787e-11	5.60129e-11	4.90051e-11	1.06166e-11	1.24598e-10	1.56845e-11	1.66124e-11	1.33354e-11	1.66826e-11	1.44018e-11	8.24904e-11	1.20634e-11	1.63359e-11	3.349e-11	3.17006e-10	2.17047e-11	3.31055e-11	1.81383e-11
1.404		1.69015e-11	1.47551e-10	1.75498e-11	1.55044e-11	1.50298e-11	1.32923e-11	1.44541e-11	2.94012e-11	1.66939e-11	1.38978e-11	4.04398e-11	2.31349e-11	2.13691e-11	1.97562e-11	2.10266e-11	1.8416e-11	8.73999e-11	1.39405e-11	2.28302e-11	2.39888e-11	5.09009e-11	1.56765e-11	4.52514e-11	1.77038e-11	1.48839e-11	1.5742e-11	2.75332e-11	1.75628e-11
1.458		2.45162e-11	4.42187e-11	4.74035e-11	1.51044e-11	1.385e-11	1.3647e-11	1.51615e-11	2.30108e-11	1.49921e-11	1.58826e-11	3.76299e-11	5.53119e-11	1.87449e-11	2.35946e-11	5.53695e-11	1.39272e-11	1.59609e-11	4.88208e-11	1.85649e-11	2.78517e-11	2.24435e-11	3.34118e-11	1.25747e-11	1.24709e-11	4.30062e-11	1.14135e-11	2.34529e-11	3.5617e-11
1.512		7.40316e-11	2.91711e-11	7.1339e-11	5.39188e-11	5.74432e-11	3.83414e-11	3.5015e-11	1.57771e-11	2.50472e-11	6.00095e-11	5.16916e-11	3.70467e-11	2.84181e-11	3.56564e-11	2.9847e-10	4.00115e-11	6.16774e-11	1.29924e-11	1.23306e-11	3.21102e-11	1.88735e-11	1.85311e-11	1.31095e-11	1.65916e-11	2.67944e-11	8.69488e-11	2.06246e-11	1.67957e-11
1.566

## Sheet: D exp2 p1
Experiment 2, Parasite 1. Nice curves with multiple peaks. Av 49 pN.
Pixels	Size
28 x 28	1.5 x 1.5 um		1 pixel = 54 nm x 54 nm
	0	0.054	0.108	0.162	0.216	0.27	0.324	0.378	0.432	0.486	0.54	0.594	0.648	0.702	0.756	0.81	0.864	0.918	0.972	1.026	1.08	1.134	1.188	1.242	1.296	1.35	1.404	1.458	1.512	1.566
0
0.054		3.35136e-11	2.24899e-11	3.30092e-11	1.49287e-11	3.84817e-11	2.31382e-11	4.19656e-11	6.7816e-11	5.75531e-11	7.9663e-11	6.15367e-11	3.5097e-11	4.6166e-11	6.74367e-11	5.2514e-11	8.59711e-11	6.07107e-11	4.32296e-11	8.67575e-11	3.16636e-11	3.36098e-11	9.94497e-11	1.31975e-11	2.9266e-11	1.08848e-11	1.66172e-11	1.66594e-11	8.14981e-11
0.108		8.65865e-11	2.11072e-11	2.36388e-11	2.14859e-11	5.04653e-11	1.07719e-11	3.41696e-11	2.35963e-10	2.40204e-11	4.16273e-11	3.50393e-11	2.63198e-11	6.57059e-11	4.84408e-11	5.70523e-11	6.85114e-11	3.79935e-11	4.08974e-11	1.21136e-10	3.41017e-11	3.07817e-11	3.2186e-11	1.6694e-11	1.48242e-11	1.18447e-11	1.57199e-11	4.97812e-11	1.59194e-11
0.162		2.50298e-11	2.76737e-11	1.42222e-11	4.37304e-11	2.32907e-11	7.82243e-10	2.02468e-11	1.33113e-11	6.06898e-11	2.33271e-11	3.14217e-11	5.04385e-11	4.4958e-11	5.26317e-11	3.93968e-11	4.84996e-11	1.10038e-11	1.85336e-10	8.99191e-11	9.9153e-11	5.36838e-11	6.20825e-11	1.17993e-10	1.13689e-11	1.92269e-11	5.47299e-11	3.06434e-11	3.47188e-11
0.216		6.78363e-11	6.1861e-11	3.49968e-11	4.29442e-11	3.25153e-11	2.56239e-11	5.21146e-11	1.93738e-11	4.37387e-11	6.10991e-11	4.04821e-11	8.31239e-11	3.96555e-11	6.13907e-11	9.58194e-11	4.76645e-11	3.86457e-11	3.45705e-11	2.06399e-09	5.69469e-11	7.25245e-11	6.23218e-11	1.00983e-10	1.9934e-11	8.81536e-11	2.03807e-11	6.5101e-11	3.45942e-11
0.27		2.84007e-11	2.12334e-11	2.88601e-11	5.17611e-11	2.20706e-11	1.56478e-11	1.49681e-11	1.38885e-11	5.91994e-11	2.12896e-11	2.37093e-11	4.83076e-11	8.05894e-11	7.59466e-11	5.73091e-11	3.2067e-11	8.86434e-11	2.00417e-11	1.76588e-11	8.3665e-11	6.74253e-11	1.11498e-09	9.44223e-11	5.06317e-11	1.26098e-10	3.64639e-11	4.1077e-11	3.01869e-11
0.324		4.20588e-11	2.11024e-11	1.82404e-11	1.84804e-11	3.77006e-11	2.58426e-11	4.28762e-11	6.10106e-11	2.92252e-11	7.0074e-11	2.39832e-11	2.57446e-11	3.0228e-11	9.73279e-12	5.48467e-11	3.41612e-11	2.22682e-11	6.24233e-11	7.15777e-11	8.42825e-11	2.29455e-10	9.30676e-11	1.17872e-10	1.13833e-10	8.17468e-11	5.47172e-11	8.11248e-11	2.78147e-11
0.378		1.29961e-11	1.99197e-11	8.36426e-11	2.03229e-11	1.46947e-11	2.94437e-11	7.40477e-11	4.84203e-11	5.09196e-11	3.30729e-11	4.39204e-11	7.88465e-11	4.32488e-11	6.54814e-11	4.46287e-11	3.65972e-11	2.03561e-11	7.69256e-11	7.94051e-11	5.86581e-11	5.58459e-11	8.10543e-11	8.42763e-11	6.81844e-11	1.15656e-10	7.51085e-11	7.44433e-11	3.65544e-11
0.432		1.44216e-11	3.06284e-11	4.21698e-11	1.66217e-11	1.31294e-11	1.58919e-11	4.76118e-11	1.55611e-11	1.56276e-10	3.32195e-11	2.81533e-11	7.03957e-11	2.44851e-11	8.00511e-11	1.7512e-11	4.29826e-11	2.98655e-11	1.1616e-10	3.78544e-11	7.52846e-11	1.33004e-10	1.27429e-10	1.62833e-10	1.16268e-10	1.12565e-10	9.10115e-11	4.58763e-11	3.33141e-11
0.486		1.5484e-11	3.24988e-11	2.461e-11	2.27536e-11	1.77991e-11	2.08359e-11	9.6782e-11	3.48711e-11	6.51316e-11	5.12904e-11	2.67577e-11	2.96892e-11	4.15535e-11	5.25275e-11	3.24234e-11	6.94667e-11	4.88328e-11	1.22178e-10	8.42498e-11	7.34457e-11	1.57783e-10	2.13389e-10	3.35695e-10	5.61436e-11	1.03192e-10	1.25521e-10	5.25652e-11	5.72843e-11
0.54		1.57102e-11	1.48269e-11	1.14665e-11	2.41862e-11	4.61359e-11	2.90959e-11	1.47859e-11	1.98783e-11	3.62281e-11	1.539e-10	7.18926e-11	1.30851e-11	6.16492e-11	8.88805e-11	1.03457e-10	7.41637e-11	5.27567e-11	3.81709e-11	7.36106e-11	5.42545e-11	5.2707e-11	5.88261e-11	9.30514e-11	3.96439e-11	5.82671e-11	2.59596e-10	4.27257e-10	5.79418e-11
0.594		1.54421e-11	4.60393e-11	1.8893e-11	1.376e-11	3.28329e-11	3.18187e-11	1.49304e-11	2.30387e-11	6.51522e-11	1.28815e-11	2.50001e-11	1.82306e-11	2.65553e-11	2.89107e-11	3.97442e-11	5.53597e-11	8.77198e-11	2.51348e-11	3.09281e-11	3.22086e-11	4.27217e-11	4.77203e-11	4.44229e-11	2.5065e-11	1.58939e-10	8.12734e-11	7.37815e-11	6.68124e-11
0.648		1.82829e-11	3.14078e-11	5.75113e-11	5.40767e-11	2.02932e-11	2.89482e-11	1.59653e-11	1.87186e-11	2.00171e-11	9.61092e-11	1.27795e-11	6.19125e-12	1.70826e-11	2.2719e-11	1.04601e-10	7.22463e-11	1.3364e-10	1.98415e-11	1.87812e-11	1.13591e-10	1.17924e-10	6.37861e-11	1.69969e-11	7.62137e-11	8.23808e-10	1.06979e-10	8.86176e-11	7.10797e-11
0.702		2.92869e-11	2.14721e-11	1.67554e-11	4.43776e-11	1.07953e-11	3.06093e-11	5.20415e-11	2.9904e-11	2.13866e-11	3.30657e-11	1.29281e-11	1.19175e-11	1.61738e-11	2.91399e-11	4.29868e-11	4.31068e-11	2.94657e-11	2.78978e-11	4.25572e-11	2.16329e-11	4.97767e-11	6.71302e-11	5.7167e-11	4.76908e-11	5.32794e-11	4.71458e-11	6.58627e-11	5.01913e-11
0.756		1.43702e-11	1.92272e-11	1.39653e-11	1.70448e-11	3.49478e-11	2.46869e-11	2.68552e-11	3.90465e-11	3.33532e-11	4.04398e-11	2.69567e-11	1.30499e-11	1.56706e-11	2.18068e-10	1.56496e-10	1.69981e-11	5.36823e-11	3.32913e-11	9.95259e-12	2.5369e-11	3.84599e-11	5.50718e-11	1.41964e-11	3.71425e-11	1.10843e-10	3.87159e-11	4.49502e-11	5.06661e-11
0.81		1.29014e-11	4.03179e-11	5.45421e-11	4.50744e-11	2.39797e-11	1.54181e-11	4.13674e-11	3.56481e-11	1.32247e-11	1.73193e-11	2.6162e-11	1.65572e-11	2.29417e-11	2.06201e-11	1.67624e-11	1.71505e-11	3.47538e-11	1.80692e-11	1.1566e-11	4.72193e-11	2.40974e-11	1.57394e-10	3.35175e-11	5.72402e-11	1.65654e-10	6.99401e-11	2.42086e-11	3.19874e-11
0.864		4.25958e-11	1.44181e-11	1.70809e-11	2.32352e-11	2.2179e-11	2.2645e-11	2.70798e-11	3.65805e-11	1.4293e-11	8.53988e-12	4.94819e-11	7.25794e-11	2.34752e-11	5.31507e-11	5.22365e-11	1.68467e-11	1.18643e-11	2.27259e-11	1.66502e-11	2.28663e-11	1.80484e-11	3.67777e-11	1.25458e-10	8.02668e-11	5.67273e-11	2.9075e-11	1.45927e-11	1.77478e-11
0.918		1.81283e-11	1.35571e-11	5.29199e-11	2.3713e-11	3.2257e-11	1.66112e-11	4.43856e-11	4.14882e-11	4.7978e-11	4.76744e-11	3.91982e-11	3.39634e-11	2.66832e-11	2.96923e-10	5.34876e-11	1.12638e-10	3.12081e-11	2.0711e-11	1.62236e-11	4.00863e-11	7.43063e-11	3.3712e-11	6.51044e-11	4.31372e-11	3.79652e-11	5.75805e-11	1.7838e-11	1.36918e-11
0.972		2.05971e-11	1.25261e-11	5.63554e-11	3.51209e-11	4.88702e-11	2.90993e-11	6.97407e-11	3.4006e-11	5.1288e-11	1.18097e-11	7.62465e-11	1.49266e-11	2.89441e-11	3.90142e-11	2.5921e-11	7.18275e-10	3.98581e-11	4.10905e-11	2.24188e-11	3.08653e-11	7.63065e-11	5.49131e-11	7.01096e-11	1.66993e-11	4.80167e-11	2.97389e-11	1.63543e-11	2.87325e-11
1.026		5.3979e-11	1.69673e-11	1.27069e-11	2.21854e-11	1.4253e-11	2.26444e-11	7.33904e-11	1.84444e-10	2.47326e-11	3.55055e-11	1.56199e-11	1.40817e-11	1.91422e-11	3.05587e-10	3.39668e-11	1.45796e-11	5.42235e-11	1.25751e-11	1.96939e-11	4.3259e-11	2.81045e-11	5.80806e-11	1.45903e-11	2.58091e-11	1.74199e-11	3.82815e-11	2.90421e-11	1.34899e-11
1.08		9.50709e-12	3.04246e-11	2.19605e-11	2.38955e-11	5.39525e-11	6.29166e-11	2.4353e-11	2.08399e-11	1.64091e-11	9.59836e-11	1.19856e-11	1.86566e-11	2.84247e-11	2.71398e-11	4.24092e-11	3.0576e-11	5.16915e-11	1.27396e-11	1.56046e-11	1.02667e-11	2.08925e-11	4.54669e-11	2.06946e-11	8.84491e-12	1.74415e-11	2.62736e-11	1.98354e-11	2.03051e-11
1.134		2.1093e-11	3.17026e-11	2.59117e-11	2.7503e-11	4.45713e-11	2.98261e-11	4.05667e-11	4.04998e-11	3.30305e-10	4.42544e-11	8.96278e-12	2.64667e-11	1.26168e-11	1.42185e-11	1.42211e-11	1.23429e-11	2.47023e-11	2.51215e-11	2.17424e-11	1.72425e-11	3.22236e-11	3.1421e-11	2.35015e-11	3.34143e-11	3.98845e-12	1.5259e-11	1.66636e-11	4.89382e-11
1.188		1.37175e-11	3.94492e-11	2.7154e-11	3.05831e-11	3.94257e-11	4.19144e-11	2.29974e-11	1.53708e-11	1.96675e-10	1.1114e-10	1.21835e-11	2.82027e-11	1.38775e-11	1.56488e-11	1.18873e-11	3.71658e-11	1.24071e-11	1.72286e-11	1.23495e-11	2.36368e-11	1.68702e-11	2.31433e-11	3.13674e-11	7.40389e-11	4.88691e-11	2.26699e-11	3.22228e-11
1.242		9.48822e-12	1.62006e-11	1.63261e-11	1.16233e-10	1.25772e-11	2.49941e-11	1.71338e-11	2.57577e-11	1.99524e-11	1.89717e-11	2.13779e-11	1.86313e-11	1.45832e-11	1.50236e-11	1.57019e-11	1.42266e-11	1.45335e-11	1.32877e-11	1.86685e-11	1.39319e-11	1.38123e-11	1.59363e-11	1.42395e-11	4.29176e-11	1.43875e-11
1.296		1.57818e-11	1.7712e-11	2.63708e-11	1.63406e-11	1.37856e-11	1.00929e-11	1.41286e-11	3.68824e-11	4.47507e-11	1.38772e-11	2.51047e-11	1.51746e-11	3.3979e-11	1.44018e-11	1.39225e-11	1.61926e-11	1.53577e-11	2.68114e-11	2.04761e-11	1.39811e-11	1.69093e-11	1.33968e-11	1.3172e-11	4.19183e-11	2.61025e-11
1.35		1.30187e-11	2.2242e-11	3.59749e-11	1.04461e-11	1.64214e-11	2.19091e-11	1.77002e-11	1.31603e-11	5.31401e-11	1.55004e-11	3.24197e-11	1.64103e-11	1.35191e-11	1.4577e-11	1.53066e-11	1.43912e-11	1.33391e-11	1.95544e-11	1.04196e-11	1.67013e-11	9.98242e-12	2.00131e-11	1.00818e-11	4.82276e-11	1.41631e-11
1.404		1.3773e-10	1.33686e-11	1.68585e-11	8.17e-12	2.66625e-11	2.28839e-11	1.87898e-11	1.48419e-11	1.67288e-11	1.66639e-11	2.62043e-11	3.66932e-11	2.01558e-11	1.30129e-11	1.82604e-11	1.28635e-11	1.30312e-11	2.58896e-11	1.74755e-11	3.95631e-11	4.21685e-11	1.32685e-11	1.38816e-11	1.56126e-10	1.77835e-11
1.458		2.27043e-11	4.96284e-11	2.9585e-11	4.11767e-11	2.13411e-11	1.62577e-11	1.43559e-11	1.10892e-11	1.6551e-11	1.35138e-11	1.41748e-11	2.82587e-11	3.77345e-11	1.22527e-11	1.61149e-11	1.61045e-11	1.94213e-11	1.52603e-11	1.89186e-11	3.95926e-11	1.30196e-11	1.47278e-11	1.60811e-11	2.34915e-11	4.13189e-11
1.512		2.41624e-11	2.31294e-11	3.08033e-11	3.09389e-11	2.52632e-11	2.8556e-11	2.99182e-11	1.37262e-11	1.59845e-11	1.54668e-11	1.61868e-11	2.80333e-11	1.38066e-11	2.06907e-11	3.38515e-11	1.11276e-11	4.29036e-11	4.57682e-11	1.57257e-11	1.22765e-11	4.52955e-11	1.02534e-11	3.71669e-11	1.66278e-11
1.566

## Sheet: D exp2 p2
Experiment 2, Parasite 2. Nice, multiple peak curves. Av 37 pN
Pixels	Size
28 x 28	1.5 x 1.5 um		1 pixel = 54 nm x 54 nm
	0	0.054	0.108	0.162	0.216	0.27	0.324	0.378	0.432	0.486	0.54	0.594	0.648	0.702	0.756	0.81	0.864	0.918	0.972	1.026	1.08	1.134	1.188	1.242	1.296	1.35	1.404	1.458	1.512	1.566
0
0.054		3.78144e-11	4.47587e-11	2.60784e-11	2.83385e-11	4.30925e-11	2.08376e-11	4.22875e-11	3.11075e-11	2.37563e-11	3.31937e-11	1.82453e-11	1.51096e-11	5.68868e-11	7.28094e-11	1.86917e-11	1.50493e-11	1.14562e-11	4.6731e-11	7.96656e-12	2.94872e-11	2.33543e-11	2.36371e-11	3.168e-11
0.108		1.02162e-10	2.87494e-11	1.51191e-11	1.07867e-11	1.41192e-11	3.36322e-11	1.64149e-11	4.03269e-11	2.55729e-11	1.74627e-09	1.94856e-11	1.34965e-10	2.31592e-11	1.28652e-11	1.42917e-11	1.08534e-11	1.7229e-11	1.62846e-11	2.4081e-11	4.85152e-11	5.24656e-11	8.67803e-11	1.12321e-11	5.99122e-11
0.162		1.28958e-11	3.66171e-11	4.80978e-11	1.17421e-11	1.30535e-11	1.04994e-10	8.04209e-11	2.61141e-11	4.17614e-11	4.9101e-11	1.49712e-11	1.46977e-10	3.49141e-11	1.16418e-11	4.57855e-11	1.38709e-11	1.38733e-11	3.09356e-11	4.60046e-11	3.61578e-11	3.16299e-11	3.83125e-11	1.07442e-10	2.72968e-11	8.6636e-11
0.216		1.57144e-11	4.52312e-11	9.41267e-12	2.0944e-11	1.30694e-11	5.4479e-11	7.2095e-11	5.93998e-11	1.55352e-11	2.55494e-11	2.05696e-11	1.23517e-11	3.38732e-11	8.31849e-11	1.34172e-10	1.11366e-11	1.46347e-11	1.69744e-11	4.3804e-11	7.95286e-11	2.1464e-11	2.3319e-11	2.09046e-11	1.68666e-11	3.35149e-11	1.1376e-11
0.27		2.5431e-11	3.45e-11	7.1199e-12	1.32536e-11	2.42781e-11	6.77645e-11	1.64572e-11	3.28055e-11	1.29153e-11	2.45747e-10	2.43906e-11	5.14128e-11	7.24123e-12	3.16881e-11	1.81799e-11	1.20446e-11	9.61075e-11	3.87599e-11	1.9774e-11	5.21006e-11	3.02818e-11	5.42201e-11	1.46633e-11	1.42896e-11	2.91128e-11	2.27613e-11	2.16032e-11
0.324		2.67879e-11	3.17546e-11	1.82206e-11	1.08695e-11	2.26619e-11	1.34092e-11	1.38305e-11	2.15336e-11	3.30772e-11	3.23568e-11	8.69422e-12	8.79929e-11	9.17864e-11	6.80049e-11	2.70161e-11	2.93779e-11	1.65953e-11	4.91816e-11	2.11298e-11	3.21839e-11	2.30894e-11	1.10093e-11	1.86056e-11	1.79436e-11	2.16768e-11	2.21843e-11	1.32989e-11	4.62713e-11
0.378		5.27443e-11	2.06596e-11	2.98216e-11	1.24585e-11	1.73948e-11	8.4758e-12	2.75654e-11	2.20571e-10	1.81578e-11	9.30485e-11	3.61143e-11	4.60985e-11	3.7632e-11	6.3597e-11	1.16333e-10	2.08022e-11	1.6659e-11	1.2819e-11	5.17094e-11	5.25265e-11	3.75847e-11	1.93617e-11	1.6107e-11	2.40143e-11	1.61105e-11	2.8556e-11	1.89086e-11	4.97573e-11
0.432		2.76343e-11	2.33476e-11	7.26509e-11	1.35881e-11	2.67326e-11	1.1969e-11	2.94371e-11	1.13898e-11	2.47446e-11	4.3828e-11	2.61458e-11	3.89734e-11	6.06835e-11	1.57109e-11	2.19842e-11	1.17963e-11	1.69603e-11	1.3276e-11	1.15459e-11	1.2344e-11	1.7667e-11	4.95049e-11	2.23084e-11	1.70969e-11	1.99347e-11	1.34694e-11	2.37941e-11	9.21727e-11
0.486		2.33981e-11	1.35804e-11	8.96447e-11	1.30735e-11	1.13814e-11	2.46878e-11	1.28501e-11	1.71933e-11	3.31629e-11	1.31471e-11	1.69154e-11	4.75456e-11	1.67174e-10	9.74666e-11	3.30784e-11	1.36556e-11	1.82857e-11	1.20143e-11	1.10269e-11	1.53025e-11	1.54824e-11	1.75373e-11	1.37275e-11	1.3198e-11	1.35539e-11	1.61162e-11	1.32921e-11	2.5389e-11
0.54		1.51211e-10	2.80333e-11	1.35297e-11	1.48379e-11	8.27733e-11	1.26641e-11	1.63712e-11	9.34788e-12	2.18693e-11	1.09823e-11	3.6665e-11	4.06363e-11	4.33914e-11	5.86775e-11	2.09194e-11	6.90057e-11	2.7472e-11	2.91603e-11	1.12029e-11	1.27624e-11	1.04176e-11	3.78513e-11	2.78102e-11	1.40222e-11	1.63392e-11	3.00192e-11	1.39281e-11	1.40498e-11
0.594		2.27293e-11	3.15872e-11	3.80493e-11	2.8268e-11	9.53964e-12	2.11077e-11	3.99073e-11	3.46094e-11	1.084e-11	2.75556e-11	4.99092e-11	2.14844e-11	1.31133e-11	9.57274e-11	1.34198e-11	2.76615e-11	1.93136e-11	6.17132e-11	4.27354e-11	1.63309e-11	1.37843e-11	1.368e-11	2.35549e-11	1.26123e-11	2.22083e-11	2.1896e-11	1.4209e-11	2.95492e-11
0.648		1.01323e-10	2.441e-11	2.48633e-11	4.95776e-11	1.1826e-11	1.71325e-11	1.34105e-11	1.1955e-11	1.01665e-11	1.58278e-11	3.53677e-11	1.3606e-11	3.78941e-11	1.3485e-11	9.88398e-12	1.05032e-11	8.55257e-11	3.48523e-11	3.92201e-11	2.64561e-11	1.51134e-11	1.67368e-11	1.5229e-11	2.42153e-11	2.22176e-11	9.18657e-11	1.5477e-11	1.74058e-11
0.702		2.37509e-10	2.22253e-11	1.20753e-11	4.68596e-11	1.59466e-11	1.21609e-11	1.006e-11	1.87124e-11	2.79214e-11	1.72268e-11	1.61521e-11	1.53811e-11	1.59543e-11	1.23011e-11	1.30886e-11	5.2981e-11	8.78438e-11	1.41292e-11	6.36519e-12	1.59154e-11	7.32521e-11	1.74114e-11	5.86046e-11	3.67971e-11	1.25324e-11	1.03758e-11	2.7764e-11	1.22842e-11
0.756		1.53434e-11	1.54338e-11	1.39853e-11	1.11694e-11	9.71685e-12	1.32868e-11	1.37597e-11	1.80417e-11	1.29938e-11	4.83023e-11	1.7213e-11	1.41457e-11	1.248e-11	4.28243e-11	1.32783e-11	6.71053e-11	3.56918e-11	1.97089e-11	4.3257e-11	4.82911e-11	4.18524e-11	1.23547e-11	2.32799e-11	3.35145e-11	1.56078e-11	1.28632e-11	1.75174e-11	1.96164e-11
0.81		1.32226e-11	4.09174e-11	9.98126e-12	1.09877e-11	5.17338e-11	2.49734e-11	1.1081e-11	2.56422e-11	2.471e-11	1.07931e-11	1.72376e-11	1.40172e-11	1.25211e-11	1.00636e-11	1.93019e-11	8.63185e-12	8.55612e-11	5.86248e-11	5.6363e-11	6.33542e-11	2.79044e-11	2.44042e-11	1.62456e-11	1.46525e-11	6.07396e-11	1.3155e-11	1.42568e-11	1.38368e-11
0.864		2.88921e-11	9.59413e-12	2.73643e-11	1.62793e-11	1.25669e-11	1.06127e-11	1.52612e-11	1.14606e-11	1.5706e-11	1.35167e-11	1.19264e-11	1.46631e-11	1.67977e-11	1.21264e-11	1.50763e-10	1.0913e-10	5.50092e-11	2.57843e-11	3.58787e-11	6.56631e-11	1.16597e-10	2.00791e-11	2.5766e-11	2.26789e-11	1.88712e-11	1.26146e-11	4.5257e-11	6.29778e-11
0.918		1.09124e-11	1.3706e-11	1.75381e-11	1.14561e-11	1.66175e-11	1.83632e-11	1.56066e-11	1.89051e-11	1.09193e-11	1.08591e-11	1.58073e-11	1.33183e-11	7.67945e-12	9.86726e-12	3.48216e-11	1.43349e-11	1.8637e-11	1.86413e-11	1.06575e-11	1.40077e-10	1.33145e-11	2.99038e-11	1.41395e-11	1.4114e-11	1.22889e-11	1.48065e-11	1.0219e-11	1.4373e-11
0.972		1.78903e-11	4.93677e-11	6.2494e-12	1.4069e-11	5.73273e-12	1.1857e-11	1.80415e-11	1.22886e-11	2.64534e-11	1.12778e-11	1.21611e-11	1.30786e-11	2.46446e-11	1.22673e-11	1.1302e-11	1.23492e-11	1.08143e-11	1.07995e-11	3.13802e-11	1.99633e-11	1.3692e-11	2.31845e-11	1.17272e-11	1.80677e-11	1.93215e-11	1.08915e-11	2.95261e-11	1.51607e-11
1.026		1.24311e-11	4.47955e-11	1.8483e-11	8.85856e-12	2.34592e-11	1.353e-11	1.35227e-11	9.33584e-12	4.04544e-11	1.26542e-11	9.90759e-12	1.67532e-11	1.11511e-11	2.29213e-11	2.4237e-11	1.61329e-11	2.10733e-11	1.30358e-11	1.24265e-11	1.4107e-11	2.57338e-11	1.18621e-11	1.79041e-11	2.21011e-11	7.79057e-12	1.65289e-11	1.2096e-11	3.49334e-11
1.08		3.72228e-11	1.12203e-10	1.92232e-11	1.41707e-11	1.99269e-11	3.23102e-11	4.47498e-11	1.24409e-11	2.05747e-11	1.51351e-11	1.63533e-11	1.90049e-11	1.41972e-11	3.16805e-11	1.41955e-11	2.1245e-11	1.20421e-11	2.45748e-11	4.7313e-11	1.0266e-11	1.65996e-11	1.37589e-11	1.19327e-11	7.29738e-12	1.31403e-11	1.03221e-11	5.84451e-11	3.9908e-11
1.134		1.61825e-11	1.60109e-11	8.20273e-12	1.28784e-11	3.4919e-11	1.24339e-11	4.71113e-11	1.15848e-11	2.17331e-11	1.44628e-10	5.96301e-11	4.37365e-11	1.11017e-11	8.76455e-11	1.0983e-11	1.55012e-11	3.83952e-11	1.15771e-11	3.22371e-11	1.85025e-11	1.23181e-11	3.16981e-11	8.84932e-12	1.51739e-11	1.9933e-11	1.00029e-11	6.05263e-11	1.04579e-11
1.188		1.54896e-11	9.05933e-12	1.93606e-11	3.46421e-11	4.65969e-11	2.95959e-11	7.79086e-11	6.32346e-11	7.75809e-11	1.15615e-11	4.3574e-11	1.00957e-11	3.245e-11	2.67641e-11	1.1448e-11	1.28474e-11	1.67228e-11	1.37761e-11	6.31848e-11	1.40663e-11	1.7784e-11	6.08891e-11	1.57227e-11	1.37014e-11	2.1763e-11	9.96899e-10	4.07497e-11	8.37512e-11
1.242		2.52516e-11	3.96156e-11	8.27474e-11	9.30074e-11	5.813e-11	4.75521e-11	3.08248e-11	2.29735e-11	8.07927e-11	1.30566e-10	1.19464e-11	1.27484e-11	1.42435e-11	4.30522e-11	7.43301e-11	1.23392e-11	9.03218e-12	1.49972e-11	2.05878e-11	1.51237e-11	1.05253e-10	1.82192e-11	2.37502e-11	2.12675e-11	1.27463e-11	6.35366e-11	4.69939e-11	6.33168e-11
1.296		1.39691e-11	1.55595e-11	5.32851e-11	1.38053e-10	6.44303e-11	4.79974e-11	1.28227e-10	3.11315e-11	2.72326e-11	1.23555e-11	1.24043e-11	1.37031e-11	2.86577e-11	2.97492e-11	8.19909e-11	3.80903e-11	1.85653e-11	2.67619e-11	3.43976e-11	4.58423e-11	3.68295e-11	5.56972e-11	5.02097e-11	1.0349e-11	6.0726e-11	2.0442e-11	1.19225e-10	7.15774e-11
1.35		1.71713e-11	1.54505e-11	6.40114e-11	1.06795e-10	1.52111e-11	3.92458e-11	4.77278e-11	4.19642e-11	1.35256e-11	1.18288e-11	9.39306e-12	1.57966e-11	1.25827e-11	1.58096e-11	3.77552e-10	6.7834e-11	1.64402e-11	5.4614e-11	4.69894e-11	1.85923e-11	4.56873e-11	3.69115e-11	1.03656e-10	5.24713e-11	5.52927e-11	1.52134e-11	5.36427e-11	6.33854e-11
1.404		3.18787e-10	5.40762e-11	4.6974e-11	1.01178e-10	8.20721e-11	2.5786e-11	5.2585e-11	2.14638e-11	1.36824e-11	5.8043e-11	1.96512e-11	4.06184e-11	1.86606e-11	8.46081e-11	7.37838e-11	2.02503e-11	3.03741e-11	1.75055e-11	3.35025e-11	1.28472e-11	1.03439e-10	3.79986e-11	4.24052e-11	3.37787e-11	1.98291e-11	3.26786e-11	1.00956e-10	1.08893e-10
1.458		3.12561e-11	1.39497e-10	7.44719e-11	1.14523e-10	1.89795e-11	4.50763e-11	5.74809e-11	5.86455e-11	3.94751e-11	8.34774e-12	1.33094e-10	1.82784e-11	1.81358e-11	2.07536e-11	1.39076e-11	4.0766e-11	2.84716e-11	1.55401e-11	1.73528e-11	4.50451e-11	2.57823e-11	2.05565e-11	5.29035e-11	1.10488e-10	1.29042e-11	4.2049e-11	2.63223e-11	4.69955e-11
1.512		1.6112e-10	2.23731e-11	7.79795e-11	4.56063e-11	4.98704e-11	2.24611e-11	1.96747e-11	1.34709e-10	5.65534e-11	1.80059e-11	2.22318e-11	2.08885e-11	2.27351e-11	2.60434e-11	1.13569e-10	3.48475e-11	5.58761e-11	7.86726e-11	3.29111e-11	1.22867e-11	1.85107e-11	1.60646e-11	8.18224e-11	4.36162e-11	2.30446e-11	1.29342e-11	1.49337e-11	1.31089e-11
1.566

## Sheet: D exp2 p3
Experiment 2, Parasite 3. Average 30 pN. Some nice double and triple peaks and single peaks + extension.
Pixels	Size
28 x 28	1.5 x 1.5 um		1 pixel = 54 nm x 54 nm
	0	0.054	0.108	0.162	0.216	0.27	0.324	0.378	0.432	0.486	0.54	0.594	0.648	0.702	0.756	0.81	0.864	0.918	0.972	1.026	1.08	1.134	1.188	1.242	1.296	1.35	1.404	1.458	1.512	1.566
0
0.054		1.76602e-11	1.93696e-11	2.07388e-11	1.47862e-11	2.64966e-11	3.71303e-11	3.60926e-11	5.87493e-11	4.62765e-11	4.35966e-11	3.5769e-11	4.49721e-11	2.22054e-11	6.23741e-11	3.89596e-11	5.54993e-11	2.07771e-11	5.12732e-11
0.108		1.51752e-11	2.08362e-11	2.24754e-11	1.26637e-11	1.39364e-11	1.94528e-11	2.04058e-11	1.32157e-11	3.93397e-11	1.8057e-11	2.36559e-11	3.76686e-11	2.0326e-11	1.27007e-11	4.47978e-11	6.80891e-11	1.98965e-11	8.42598e-11	1.76434e-11
0.162		1.54715e-11	8.65728e-11	3.99063e-11	1.18515e-11	3.00612e-11	8.79175e-11	1.86389e-11	2.44182e-11	1.62037e-11	3.78291e-11	3.75887e-11	1.29076e-11	2.10396e-11	1.52269e-11	1.40587e-11	3.24779e-11	3.22267e-11	5.50627e-11	4.66242e-11	3.07831e-11
0.216		1.26145e-11	4.53671e-11	1.5767e-11	2.86467e-11	1.17202e-11	5.93348e-11	1.64034e-11	1.4516e-11	4.89478e-11	2.54374e-11	3.86782e-11	3.62001e-11	3.09103e-11	1.63798e-11	2.66256e-11	2.49076e-11	3.92836e-11	7.07867e-11	8.07684e-11	3.50427e-11	3.85494e-11
0.27		2.15762e-11	2.33572e-11	2.05573e-11	1.99522e-11	1.55096e-11	1.90271e-11	1.96026e-11	1.52394e-11	1.5858e-11	1.58173e-11	1.92654e-11	1.5741e-11	1.69037e-11	1.95393e-11	4.57992e-11	2.01839e-11	1.95256e-11	2.22287e-11	1.95398e-11	3.66116e-11	8.05416e-11	3.94448e-11
0.324		1.44107e-11	2.9173e-11	2.11594e-11	1.03809e-11	1.87589e-11	4.92939e-11	1.31093e-11	4.56693e-11	8.63677e-11	1.39162e-11	1.8625e-11	6.57134e-11	4.33295e-11	1.83981e-11	3.03559e-11	4.91346e-11	1.73121e-11	2.5423e-11	6.03843e-11	1.90122e-11	2.93998e-11	5.94667e-11	3.2857e-11	2.2227e-11
0.378		1.58902e-11	1.27306e-11	1.25338e-11	2.38856e-11	1.62766e-11	2.65229e-11	1.59064e-11	4.9863e-11	1.57071e-11	1.69086e-11	2.63177e-11	2.07119e-11	1.35934e-11	1.26469e-10	2.7597e-11	1.87007e-11	3.82764e-11	3.01376e-11	3.18177e-11	3.95481e-11	5.91705e-11	4.18554e-11	3.47541e-11	1.46692e-11	1.80205e-11
0.432		1.59808e-11	1.5914e-11	2.02961e-11	4.25274e-11	1.5197e-11	3.16205e-11	1.58046e-11	2.12597e-11	1.50114e-11	3.10758e-11	4.52335e-11	1.89877e-11	2.67991e-11	5.16838e-11	1.77877e-11	2.0149e-11	1.66647e-11	3.11242e-11	3.4195e-11	3.09164e-11	4.75779e-11	4.41265e-11	7.88112e-11	3.22187e-11	2.83096e-11	2.08312e-11
0.486		1.69204e-11	1.41068e-11	2.04089e-11	3.45621e-11	5.88549e-12	1.43779e-11	5.83201e-11	3.46871e-11	1.91707e-11	1.87792e-11	2.71093e-11	1.73269e-11	2.08317e-11	1.43146e-11	2.18268e-11	2.20738e-11	3.29311e-11	1.48176e-11	1.70042e-11	1.78369e-11	2.23346e-11	6.1216e-11	6.67818e-11	3.4243e-11	3.10999e-11	2.441e-11	5.61831e-11	4.70069e-11
0.54		1.74465e-11	1.57984e-11	4.41936e-11	1.81162e-11	1.63851e-11	1.03673e-11	2.19114e-11	1.35816e-11	2.44319e-11	1.50945e-11	5.18866e-11	1.86528e-11	3.78644e-11	7.36132e-11	1.84317e-11	3.77107e-11	1.43253e-11	1.82238e-11	1.43792e-11	2.26135e-11	3.25761e-11	2.92856e-11	7.90466e-11	1.42815e-11	3.87272e-11	2.91873e-11	2.08883e-11	1.46109e-11
0.594		1.5819e-11	1.38124e-11	1.09985e-11	2.36834e-11	1.27232e-11	1.33746e-11	4.01e-11	2.19868e-11	1.51519e-11	1.6917e-11	1.58965e-11	1.17035e-11	2.26605e-11	1.67069e-11	7.35895e-11	1.50811e-11	2.08012e-11	4.11228e-11	4.30695e-11	3.02022e-11	2.15188e-11	1.57238e-11	5.27104e-11	8.2717e-11	8.13871e-11	3.85731e-11	2.4396e-11	9.98112e-11
0.648		1.23317e-11	2.04636e-11	2.08162e-11	9.30262e-12	1.5892e-11	1.63344e-11	1.30484e-11	3.03111e-11	6.23771e-11	3.98873e-11	1.66298e-11	1.03342e-10	1.22005e-10	2.66404e-11	4.64312e-11	4.61363e-11	2.30618e-10	2.57551e-11	7.64353e-11	4.19031e-11	3.13289e-11	1.66959e-11	1.23146e-10	1.84371e-11	2.41069e-11	3.4054e-11	4.82162e-11	5.15556e-11
0.702		1.40286e-11	1.48845e-11	1.48217e-11	1.37313e-11	2.37809e-11	1.50606e-11	1.65711e-11	1.88495e-11	1.59777e-11	2.27309e-11	1.65962e-11	3.09575e-11	1.8261e-11	1.45925e-11	1.61977e-11	3.80163e-11	2.9564e-11	2.54773e-11	2.3002e-11	1.71717e-11	2.68742e-10	1.60086e-11	1.78536e-11	3.23784e-11	1.46956e-11	2.15762e-11	4.90436e-11	4.27907e-11
0.756		3.01663e-11	2.01043e-11	3.27618e-11	7.52831e-12	1.91574e-11	2.28402e-11	2.01382e-11	2.91358e-11	4.05916e-11	1.53109e-11	1.55227e-11	1.53519e-11	6.87234e-11	1.43159e-11	1.69243e-11	1.70525e-11	3.12014e-11	1.13164e-11	2.82166e-11	1.12344e-10	5.31088e-11	2.13063e-11	3.71751e-11	3.00883e-11	3.45956e-11	3.06773e-11	2.93492e-11	4.1489e-11
0.81		3.22116e-11	1.67495e-11	1.66137e-11	1.06399e-11	5.90058e-11	1.86285e-11	2.37828e-11	2.66826e-11	1.63344e-11	4.66477e-11	9.94313e-12	1.45379e-11	1.526e-11	2.69278e-11	2.13033e-11	5.47452e-11	3.63646e-11	1.31631e-11	3.86511e-11	1.60606e-11	1.18032e-11	3.2043e-11	2.04738e-11	2.72138e-11	1.71812e-11	3.14357e-11	6.04571e-11	4.91642e-11
0.864		2.38981e-11	1.54357e-11	1.81553e-11	1.13698e-11	1.43411e-11	1.72627e-11	5.18801e-11	1.88944e-11	1.55702e-11	2.1286e-11	1.45454e-11	1.72269e-11	1.34078e-11	1.75124e-11	3.48898e-11	1.68611e-11	1.38052e-11	1.67024e-11	3.23134e-11	3.01896e-11	1.80176e-11	3.67326e-11	3.06176e-11	2.22606e-11	3.23202e-11	8.98772e-11	3.42444e-11	4.65363e-11
0.918		9.56708e-12	1.81419e-11	2.28547e-11	1.28633e-11	1.69172e-11	3.82074e-11	3.81899e-11	1.19035e-11	1.83712e-11	1.51107e-11	1.64236e-11	5.75961e-11	5.31504e-11	2.13538e-11	1.56072e-11	2.04779e-11	4.04781e-11	1.33828e-11	1.4654e-11	1.63061e-11	2.55369e-11	5.73478e-11	3.64872e-11	4.24535e-11	2.65436e-11	3.2213e-11	3.48531e-11	2.33785e-11
0.972		1.93801e-11	8.86926e-11	4.95403e-11	1.61756e-11	1.07417e-11	4.0835e-11	2.0729e-11	1.57996e-11	1.15916e-11	1.99729e-11	1.20212e-11	2.13933e-11	2.16716e-11	4.06568e-11	4.21909e-11	1.75666e-11	1.58373e-11	2.12934e-11	1.50189e-11	2.17672e-11	1.5801e-11	5.11448e-11	5.03617e-11	4.1579e-11	2.08155e-11	3.12726e-11	4.35392e-11	7.83672e-11
1.026			4.77832e-11	4.30163e-11	3.24456e-11	2.70086e-11	1.85653e-11	2.04238e-11	1.60825e-11	2.82914e-11	1.68544e-11	1.21885e-11	1.668e-11	1.96447e-11	1.55827e-11	4.90808e-11	4.0082e-11	1.7472e-11	5.79913e-11	8.7272e-11	7.6215e-12	4.38861e-11	3.47814e-10	8.6874e-11	1.96465e-11	6.39459e-11	3.42794e-11	4.64846e-11	8.35749e-11
1.08					1.57526e-11	2.82646e-11	4.36746e-11	3.65879e-11	1.209e-11	8.02956e-12	4.1904e-11	3.83387e-11	1.69351e-11	1.93524e-11	1.64452e-11	2.37085e-11	1.66271e-11	2.51559e-11	1.30699e-11	2.04107e-11	3.82337e-11	6.04079e-11	1.45289e-11	2.20307e-11	1.3238e-11	4.28759e-11	1.6204e-11	1.55352e-11	2.18832e-11
1.134						1.58078e-11	4.11962e-11	1.55715e-11	1.94989e-11	1.09789e-11	3.94149e-11	3.16221e-11	1.40801e-11	2.01934e-11	1.91517e-11	1.76213e-11	1.5281e-11	1.4645e-11	4.22167e-11	1.63385e-11	1.18031e-11	3.60118e-11	1.55513e-11	7.11318e-12	1.28027e-11	7.63163e-11	1.81333e-11	1.64044e-11	1.91512e-11
1.188								1.95435e-11	1.03987e-11	2.23425e-11	2.12291e-11	2.53804e-11	2.28523e-11	2.14946e-11	1.48741e-11	1.99006e-11	1.94829e-11	1.83954e-11	1.70919e-11	3.67936e-11	4.23554e-11	1.32317e-11	1.59933e-11	3.7821e-11	2.63195e-11	2.10932e-11	1.54839e-11	2.61025e-11	1.40748e-11
1.242									4.65694e-11	1.94524e-11	1.61485e-11	2.16795e-11	2.10984e-11	1.59051e-11	2.28362e-11	1.78271e-11	2.6412e-11	1.91243e-11	3.3478e-11	1.66353e-11	4.76859e-11	3.32704e-11	3.81254e-11	1.84981e-11	3.01686e-11	1.99167e-11	3.03447e-11	3.22488e-11	2.57238e-11
1.296											1.31279e-11	2.51128e-11	1.75708e-11	1.80422e-11	1.79441e-11	1.5866e-11	2.12686e-11	1.59135e-11	1.68663e-11	2.23642e-11	1.59261e-11	3.53422e-11	1.62004e-11	1.59176e-11	6.28164e-11	5.44638e-11	3.41422e-11	4.67514e-11	1.47414e-11
1.35													1.97469e-11	1.7828e-11	1.69338e-11	1.86254e-11	1.58755e-11	3.96738e-11	3.12362e-11	1.74286e-11	1.45024e-11	2.38717e-11	2.23413e-11	2.08815e-10	1.39444e-11	5.00006e-11	1.34724e-10	1.91795e-11	1.36315e-11
1.404														1.76823e-11	1.32962e-11	1.99809e-11	1.93744e-11	3.16158e-11	4.08901e-11	2.31724e-11	1.52381e-11	1.65594e-11	1.74537e-11	2.34162e-11	2.63863e-11	2.35628e-11	6.78372e-12	6.9289e-11	4.43192e-11
1.458															3.65551e-11	2.28958e-11	2.13077e-11	1.0367e-11	1.81938e-10	1.80792e-11	1.48512e-11	2.98203e-11	1.31945e-11	1.85959e-11	1.69319e-11	2.63482e-11	2.15919e-11	3.30078e-11	2.17241e-11
1.512																	1.2739e-11	5.26134e-11	1.47046e-11	1.89011e-11	2.09116e-11	3.51177e-11	3.9756e-11	2.06824e-11	5.37287e-11	2.49846e-11	3.17222e-11	1.6632e-11	2.01118e-11
1.566

## Sheet: D exp3 p1
Experiment 3, Parasite 1. Average force 25 pN. Not so many multiple peaks but some single peaks.
Pixels	Size
28 x 28	1.5 x 1.5 um		1 pixel = 54 nm x 54 nm
	0	0.054	0.108	0.162	0.216	0.27	0.324	0.378	0.432	0.486	0.54	0.594	0.648	0.702	0.756	0.81	0.864	0.918	0.972	1.026	1.08	1.134	1.188	1.242	1.296	1.35	1.404	1.458	1.512	1.566
0
0.054		2.61884e-11	1.73176e-11	2.57768e-11	1.63211e-11	4.50373e-11	2.1905e-11	7.59675e-11	3.63449e-11	1.62733e-11	4.34147e-11	2.1622e-11	3.87094e-11	1.11356e-11	2.43342e-11	2.29539e-11	1.91953e-11	2.16276e-11	2.64306e-11	9.78098e-12	6.99212e-11	2.5036e-11	1.2315e-11	3.17763e-11	1.7658e-11	2.04901e-11	6.30594e-11	1.89533e-11	1.51492e-11
0.108		2.03737e-11	2.04273e-11	3.21166e-11	2.53689e-11	4.14385e-11	2.69709e-11	2.63322e-11	5.81513e-11	7.09998e-11	2.96974e-11	2.40411e-11	1.90841e-11	2.43208e-11	1.3155e-11	1.12324e-11	2.57553e-11	1.88234e-11	1.64121e-11	2.64475e-11	1.66092e-11	1.95356e-11	1.27783e-11	1.67672e-11	1.4209e-11	2.13694e-11	6.76143e-11	1.18649e-11	2.6118e-11
0.162		2.53696e-11	1.91931e-11	2.80783e-11	2.05116e-11	3.99507e-11	1.66153e-11	2.79763e-11	1.94211e-11	1.96402e-11	5.64855e-11	1.78614e-11	2.41803e-11	6.2547e-11	2.0754e-11	7.62018e-11	1.84755e-11	1.72217e-11	5.66719e-11	1.13613e-11	3.07491e-11	4.25616e-11	2.15014e-11	1.81985e-11	1.91363e-11	2.54587e-11	1.15427e-11	1.94508e-11	3.45539e-11
0.216		1.28554e-11	1.72293e-11	2.31651e-11	1.95321e-11	7.89203e-11	3.56927e-11	1.92832e-11	4.42692e-11	1.59475e-11	2.53551e-11	1.96133e-11	3.49489e-11	1.60667e-11	2.1124e-11	2.01449e-11	2.32661e-11	1.68201e-11	1.68466e-11	2.4512e-11	6.76906e-11	4.30381e-11	2.10001e-11	1.31814e-11	2.33085e-11	1.71564e-11	5.28069e-11	2.08873e-11	1.77494e-11
0.27		3.04428e-11	2.06755e-11	2.5955e-11	6.38054e-11	3.52247e-11	1.97179e-11	2.19724e-11	1.71807e-11	2.00941e-11	2.37979e-11	1.59016e-11	1.468e-11	2.48199e-11	2.06845e-11	1.96219e-11	1.93417e-11	1.76886e-11	5.43009e-11	2.20066e-11	3.37055e-11	1.94488e-11	2.17574e-11	2.34785e-11	1.83495e-11	2.21101e-11	2.81318e-11	2.85246e-11	2.21722e-11
0.324		4.21579e-11	1.87996e-11	2.18028e-11	6.405e-11	2.03969e-11	3.78936e-11	1.6655e-11	1.9182e-11	1.55326e-11	1.73998e-11	1.42809e-11	3.50386e-11	1.70364e-11	1.73054e-11	1.98892e-11	2.03491e-11	2.07028e-11	2.42743e-11	2.06088e-11	1.26255e-11	1.54658e-11	1.80033e-11	1.94956e-11	1.73011e-11	1.86689e-11	2.00428e-11	2.51173e-11	4.14499e-11
0.378		2.00044e-11	3.45116e-11	4.8897e-11	7.8891e-11	1.59461e-11	5.45345e-11	2.15585e-11	2.07018e-11	1.80351e-11	7.39844e-11	1.80288e-11	1.69013e-11	2.22818e-11	2.18816e-11	2.00285e-11	1.78869e-11	1.91349e-11	2.40044e-11	1.7645e-11	4.44719e-11	2.69317e-11	2.47968e-11	2.76157e-11	2.51846e-11	1.63211e-11	1.96519e-11	2.27286e-11	5.16583e-11
0.432		1.04663e-11	7.79469e-11	1.52693e-11	2.51977e-11	2.91856e-11	1.79136e-11	1.83877e-11	2.28938e-11	1.9243e-11	4.76979e-11	4.38036e-11	2.54665e-11	2.58291e-11	1.9742e-11	1.31314e-11	2.07018e-11	2.42767e-11	2.14415e-11	2.27309e-11	1.97686e-11	1.44871e-11	2.52525e-11	3.765e-11	1.18515e-11	1.73379e-11	2.05878e-11	3.27684e-11	5.46297e-11
0.486		2.76233e-11	1.83159e-11	1.99155e-11	2.22376e-11	2.4825e-11	2.14887e-11	1.9951e-11	1.8563e-11	1.4437e-11	3.74806e-11	2.58099e-11	1.3892e-11	1.9041e-11	2.76414e-11	2.40858e-11	1.83807e-11	1.94915e-11	1.88681e-11	2.03381e-11	2.32628e-11	3.51057e-11	1.58404e-11	1.88766e-11	2.02657e-11	2.09572e-11	1.93117e-11	1.72036e-11	1.9506e-11
0.54		1.18478e-11	7.81937e-11	2.02149e-11	1.8923e-11	2.83779e-11	2.12792e-11	1.33881e-11	2.3097e-11	1.76683e-11	1.64399e-11	1.52194e-11	2.35939e-11	2.59727e-11	1.88354e-11	2.14784e-11	2.32802e-11	1.26934e-11	2.63373e-11	1.83008e-11	2.20851e-11	1.80513e-11	1.9139e-11	1.9064e-11	1.71995e-11	2.12447e-11	1.80326e-11	1.82595e-11	3.4197e-11
0.594		1.89924e-11	2.15086e-11	1.29025e-11	1.52565e-11	1.4035e-11	2.73559e-11	5.83467e-11	2.58589e-11	3.48461e-11	1.86134e-11	4.30838e-11	3.7728e-11	2.11313e-11	1.95273e-11	8.36888e-11	1.91052e-11	2.48905e-11	1.99775e-11	2.43982e-11	2.61131e-11	2.14563e-11	2.54526e-11	1.45007e-11	1.88023e-11	2.39877e-11	2.08189e-11	1.72554e-11	2.78934e-11
0.648		1.38041e-11	2.30662e-11	2.29431e-11	2.6235e-11	1.96771e-11	1.73655e-11	2.31109e-11	1.90532e-11	1.89594e-11	2.137e-11	2.10395e-11	3.13147e-11	2.14966e-11	1.71331e-11	2.61711e-11	1.50414e-11	2.60418e-11	2.21157e-11	2.262e-11	3.76956e-11	2.43396e-11	5.52195e-11	1.67157e-11	1.03768e-11	1.72587e-11	1.60481e-11	1.94691e-11	1.94493e-11
0.702		1.67274e-11	2.43908e-11	2.39967e-11	1.20931e-11	1.98415e-11	2.04034e-11	2.15381e-11	2.06063e-11	1.43927e-11	1.92064e-11	1.96005e-11	2.13405e-11	1.87369e-11	2.40333e-11	2.80015e-11	1.28179e-11	2.75206e-11	1.57216e-11	1.44982e-11	2.23129e-11	2.02653e-11	5.41151e-11	2.18294e-11	1.48084e-11	1.77352e-11	6.41892e-11	1.70041e-11	1.96539e-11
0.756		1.56934e-11	1.91351e-11	1.78532e-11	1.88272e-11	1.79629e-11	1.67192e-11	1.10016e-11	2.08487e-11	2.47162e-11	1.83489e-11	1.8041e-11	2.4623e-11	1.7257e-11	2.06578e-11	3.07546e-11	2.60204e-11	1.72284e-11	2.13625e-11	2.63634e-11	1.83353e-11	1.73959e-11	2.05417e-11	2.83887e-11	6.07879e-11	1.91271e-11	3.39492e-11	1.8942e-11	5.70366e-11
0.81		2.1203e-11	2.40191e-11	1.81972e-11	1.53333e-11	1.59426e-11	1.93427e-11	1.7394e-11	1.84229e-11	2.0265e-11	2.12938e-11	1.3441e-11	2.40346e-11	1.96102e-11	2.15067e-11	4.7456e-11	9.10348e-11	2.09945e-11	2.4399e-11	1.98449e-11	2.061e-11	2.09319e-11	2.12558e-11	2.25295e-11	2.34833e-11	1.67455e-11	3.54449e-11	3.71611e-11	3.31466e-11
0.864		2.43259e-11	2.75157e-11	2.25516e-11	1.94147e-11	1.84988e-11	2.03165e-11	2.71747e-11	1.91103e-11	1.97622e-11	2.47163e-11	1.98176e-11	1.23454e-11	1.63887e-11	2.04036e-11	3.41131e-11	1.90058e-11	1.56593e-11	2.54213e-11	1.99496e-11	2.63305e-11	2.86092e-11	4.04154e-11	5.6466e-11	2.96466e-11	1.05645e-10	2.6961e-11	5.8498e-11	1.38259e-11
0.918		2.11608e-11	1.80069e-11	1.82151e-11	1.98857e-11	2.14348e-11	1.94153e-11	1.4695e-11	2.62003e-11	2.16446e-11	2.00063e-11	2.29928e-11	2.91856e-11	1.70666e-11	2.18254e-11	2.00597e-11	2.67643e-11	1.80703e-11	1.80584e-11	1.26595e-11	1.93345e-11	2.50002e-11	1.58698e-11	1.61613e-11	1.68961e-11	1.80518e-11	2.9299e-11	1.5583e-11	2.65709e-11
0.972		1.79828e-11	2.04086e-11	1.81028e-11	2.15509e-11	1.87763e-11	1.98158e-11	3.8795e-11	1.96277e-11	2.10521e-11	1.42219e-11	1.74171e-11	1.59909e-11	1.434e-11	1.62112e-11	1.62364e-11	1.79811e-11	5.06923e-11	2.0042e-11	2.49155e-11	2.39146e-11	4.46978e-11	1.15668e-11	1.69852e-11	9.24241e-11	2.11375e-11	2.20973e-11	2.76942e-11	4.13495e-11
1.026		2.22022e-11	2.38087e-11	2.33485e-11	2.57044e-11	2.48712e-11	1.53157e-11	2.13722e-11	1.78849e-11	1.26328e-11	1.73777e-11	2.55224e-11	2.82116e-11	1.75139e-11	1.99874e-11	3.34467e-11	1.97505e-11	6.27971e-11	2.0356e-11	1.89075e-11	2.90042e-11	1.09334e-11	1.76354e-11	2.23589e-11	1.9055e-11	1.79738e-11	1.71344e-11	2.69474e-11	2.15329e-11
1.08		2.32901e-11	7.71836e-11	2.50141e-11	1.82867e-11	1.98215e-11	1.93561e-11	2.439e-11	3.13548e-11	1.6697e-11	1.89206e-11	4.69716e-11	2.3223e-11	2.01337e-11	2.41706e-11	3.26259e-11	1.56513e-11	3.60847e-11	2.06742e-11	5.79885e-11	2.65165e-11	2.37502e-11	2.03353e-11	2.06257e-11	2.72016e-11	2.07133e-11	1.68731e-11	1.91192e-11	3.92334e-11
1.134		1.81217e-11	2.19551e-11	2.05535e-11	2.89161e-11	1.67442e-11	2.29457e-11	1.71368e-11	2.36186e-11	2.13931e-11	2.39864e-11	1.12584e-11	1.85588e-11	2.18048e-11	1.88654e-11	2.52124e-11	4.30655e-11	4.25903e-11	1.64275e-11	1.98343e-11	2.30643e-11	1.63228e-11	2.70226e-11	2.01455e-11	4.44443e-11	2.1275e-11	2.11712e-11	1.57064e-11	1.69321e-11
1.188		2.02617e-11	1.72101e-11	1.93018e-11	3.18262e-11	2.27625e-11	2.24331e-11	2.96287e-11	2.60631e-11	1.83887e-11	1.45637e-11	2.58013e-11	1.90176e-11	1.87099e-11	2.4228e-11	2.21943e-11	2.47697e-11	2.18492e-11	1.44749e-11	2.2132e-11	4.31489e-11	2.48337e-11	1.49313e-11	2.00257e-11	1.58008e-11	2.07734e-11	1.97767e-11	1.88718e-11	1.93086e-11
1.242		1.81121e-11	1.83312e-11	2.27514e-11	1.91021e-11	2.18166e-11	7.05703e-11	3.76456e-11	2.33016e-11	2.77437e-11	2.04248e-11	1.49392e-11	1.80855e-11	2.30793e-11	1.94774e-11	2.53961e-11	6.28183e-11	1.81779e-11	2.0827e-11	2.35554e-11	1.09954e-11	1.70035e-11	2.59712e-11	1.69494e-11	1.92721e-11	2.22824e-11	2.38384e-11	2.25308e-11	3.68495e-11
1.296		4.58746e-11	1.873e-11	1.81822e-11	2.92681e-11	1.7537e-11	8.24064e-11	1.54588e-11	3.19727e-11	1.73521e-11	1.9831e-11	2.02392e-11	1.39085e-11	5.89418e-11	1.80304e-11	4.86066e-11	2.04206e-11	2.04668e-11	2.34044e-11	2.57393e-11	3.41987e-11	2.0986e-11	1.63765e-11	2.39183e-11	1.85712e-11	4.30947e-11	2.04458e-11	3.76637e-11	1.76304e-11
1.35		2.2854e-11	2.61127e-11	2.28931e-11	2.38152e-11	1.93707e-11	4.25208e-11	1.66035e-11	2.32401e-11	2.19785e-11	1.15897e-11	1.67768e-11	1.62935e-11	1.42593e-11	2.33054e-11	1.82348e-11	3.26009e-11	2.19455e-11	2.13154e-11	1.90308e-11	1.65026e-11	2.8718e-11	1.92533e-11	2.23793e-11	2.05935e-11	1.60514e-11	2.76511e-11	2.64651e-11	5.51778e-11
1.404		1.98033e-11	1.16366e-11	1.99534e-11	2.34663e-11	1.72675e-11	2.19437e-11	5.12817e-11	1.86814e-11	2.04012e-11	1.98611e-11	1.9007e-11	2.09077e-11	1.87576e-11	1.62655e-11	2.34254e-11	2.79505e-11	1.94949e-11	2.1088e-11	2.39905e-11	1.74651e-11		2.2153e-11					2.41571e-11	4.13051e-11
1.458		6.91517e-11	1.87251e-11	2.31993e-11	2.11848e-11	1.75643e-11	3.53162e-11	1.61023e-11	1.77719e-11	1.37063e-11	3.16219e-11	2.21294e-11	4.14139e-11	3.61947e-11		1.56788e-11	3.7462e-11	1.95183e-11	1.539e-11	2.51478e-11	2.19119e-11
1.512		8.28479e-11	2.75929e-11	1.91794e-11	2.5365e-11
1.566

## Sheet: D exp3 p2
Experiment 3, Parasite 2. Average 25 pN.
Pixels	Size
28 x 28	1.5 x 1.5 um		1 pixel = 54 nm x 54 nm
	0	0.054	0.108	0.162	0.216	0.27	0.324	0.378	0.432	0.486	0.54	0.594	0.648	0.702	0.756	0.81	0.864	0.918	0.972	1.026	1.08	1.134	1.188	1.242	1.296	1.35	1.404	1.458	1.512	1.566
0
0.054		2.82205e-11	6.73523e-11	2.51109e-11	3.22347e-11	1.41467e-11	1.24769e-11	1.84951e-11	1.52659e-11	1.86188e-11	1.62903e-11	4.56107e-11	2.2831e-11	2.1803e-11	2.19079e-11	2.42993e-11	2.4109e-11	1.44502e-11	2.2235e-11	2.26184e-11	3.0206e-11	2.35173e-11	2.34806e-11	4.75181e-11	2.32512e-11	2.22108e-11	2.33541e-11	2.2349e-11	2.67404e-11
0.108		1.88868e-11	2.05735e-11	3.06237e-11	1.48897e-11	2.02481e-11	1.80498e-11	2.26505e-11	2.58548e-11	2.27976e-11	2.3083e-11	1.89383e-11	1.42661e-11	2.09209e-11	2.01698e-11	3.05012e-11	2.03406e-11	1.98634e-11	1.7249e-11	2.26565e-11	2.50521e-11	2.33854e-11	2.26914e-11	3.86081e-11	3.04122e-11	1.48282e-11	1.13516e-11	3.43758e-11	1.35266e-11
0.162		7.06397e-11	2.18925e-11	4.24245e-11	1.7344e-11	2.20557e-11	2.47448e-11	7.32146e-11	1.55623e-11	1.85328e-11	1.8129e-11	2.17093e-11	2.28053e-11	2.26016e-11	2.23584e-11	1.44705e-11	2.51245e-11	2.33928e-11	1.18453e-11	4.72879e-11	2.46835e-11	1.92981e-11	2.49773e-11	1.67217e-11	1.77032e-11	2.206e-11	2.63229e-11	2.23178e-11	2.32178e-11
0.216		5.40169e-11	2.85748e-11	9.4309e-12	3.56442e-11	3.40108e-11	2.02642e-11	2.05116e-11	2.88283e-11	1.41037e-11	1.91035e-11	4.25439e-11	2.10834e-11	1.4997e-11	2.05886e-11	2.33805e-11	7.8515e-11	2.37381e-11	1.82881e-11	3.34144e-11	1.96118e-11	1.92272e-11	1.58146e-11	2.17103e-11	2.05665e-11	2.47744e-11	1.37143e-11	1.46969e-11	2.30616e-11
0.27		2.10882e-11	2.9241e-11	2.30824e-11	4.44679e-11	1.41823e-11	2.70439e-11	4.28875e-11	3.03364e-11	2.17426e-11	2.25086e-11	3.07756e-11	2.11481e-11	1.78901e-11	1.8653e-11	1.29498e-11	1.66231e-11	2.53059e-11	1.8703e-11	2.87081e-11	1.58994e-11	1.9981e-11	2.79949e-11	1.86377e-11	2.51781e-11	7.8049e-12	1.95475e-11	2.0718e-11	2.40682e-11
0.324		3.37348e-11	3.99182e-11	3.5457e-11	2.55888e-11	1.50061e-11	2.92399e-11	2.24962e-11	2.04254e-11	3.31809e-11	1.81257e-11	4.70297e-11	2.20197e-11	2.23996e-11	2.38646e-11	2.38792e-11	2.30787e-11	6.53064e-11	2.23927e-11	1.51255e-11	1.75522e-11	1.96454e-11	2.1794e-11	2.15195e-11	2.48808e-11	3.81931e-11	2.85411e-11	2.12958e-11	2.07936e-11
0.378		2.33277e-11	3.22572e-11	2.18452e-11	1.2859e-11	1.88681e-11	2.3839e-11	2.34498e-11	1.65121e-11	2.42099e-11	1.70211e-11	2.12715e-11	1.44622e-11	2.07248e-11	2.48199e-11	2.4885e-11	1.82909e-11	1.94029e-11	1.93328e-11	2.08306e-11	3.07824e-11	1.60862e-11	1.02944e-11	2.97794e-11	4.29008e-11	1.21798e-11	4.16672e-11	1.97713e-11	2.00775e-11
0.432		4.52395e-11	2.09402e-11	2.05523e-11	1.91271e-11	2.47447e-11	1.46363e-11	1.89467e-11	1.62807e-11	1.49435e-11	1.10294e-11	1.6223e-11	1.6596e-11	2.54381e-11	1.73809e-11	4.61127e-11	2.95662e-11	1.36078e-11	2.46482e-11	1.79388e-11	1.4631e-11	1.89057e-11	2.95577e-11	1.68165e-11	2.1946e-11	1.59778e-11	1.52533e-11	2.96189e-11	2.40396e-11
0.486		3.45879e-11	2.40119e-11	2.17515e-11	2.1054e-11	2.33103e-11	2.06242e-11	4.06665e-11	1.76406e-11	2.71629e-11	1.4828e-11	5.72124e-11	7.76301e-11	1.71914e-11	2.22288e-11	1.73942e-11	2.07597e-11	2.20045e-11	6.79017e-11	1.70413e-11	1.75227e-11	4.44179e-11	2.60494e-11	2.29462e-11	1.9058e-11	2.84134e-11	5.96391e-11	2.10118e-11	2.46829e-11
0.54		2.16424e-11	2.32735e-11	4.95249e-11	2.16092e-11	1.85375e-11	1.90925e-11	4.53918e-11	1.70747e-11	2.46051e-11	3.7191e-11	1.93022e-11	2.36318e-11	4.03171e-11	7.49684e-11	3.73404e-11	2.08616e-11	2.02421e-11	2.24065e-11	2.04178e-11	1.80165e-11	2.12813e-11	1.25764e-11	2.57407e-11	1.93253e-11	2.74874e-11	2.68536e-11	2.31553e-11	2.21155e-11
0.594		4.6283e-11	6.81988e-11	2.59214e-11	1.88027e-11	3.77684e-11	1.72772e-11	2.05337e-11	1.63975e-11	4.25612e-11	7.51239e-11	3.92319e-11	1.4847e-11	3.01392e-11	2.12388e-11	2.40986e-11	2.03615e-11	1.75707e-11	2.85032e-11	1.81422e-11	2.25642e-11	1.75982e-11	1.74429e-11	1.44254e-11	2.0786e-11	2.28596e-11	3.47494e-11	5.85244e-11	2.60471e-11
0.648		2.50169e-11	2.56921e-11	2.24845e-11	2.44202e-11	2.16277e-11	2.93751e-11	2.83664e-11	2.01172e-11	3.48439e-11	2.1862e-11	2.96556e-11	2.04296e-11	2.16773e-11	1.62238e-11	1.78046e-11	1.88231e-11	2.25832e-11	1.737e-11	2.02907e-11	2.6659e-11	4.93719e-11	2.31713e-11	3.9461e-11	2.81101e-11	1.68826e-11	2.18106e-11	2.09063e-11	2.10187e-11
0.702		2.55873e-11	2.25162e-11	2.01693e-11	2.27046e-11	2.09805e-11	3.31312e-11	1.27977e-11	1.87002e-11	2.57387e-11	2.40437e-11	1.86056e-11	2.0722e-11	2.96954e-11	1.68107e-11	1.46434e-11	2.15293e-11	2.53915e-11	3.31225e-11	2.26838e-11	2.30486e-11	1.67032e-11	2.6245e-11	1.97837e-11	1.86521e-11	1.67468e-11	1.93543e-11	2.49458e-11	2.13605e-11
0.756		1.93872e-11	3.47264e-11	2.60255e-11	2.10272e-11	2.84949e-11	2.26886e-11	2.57123e-11	1.81978e-11	2.35158e-11	2.57255e-11	1.72364e-11	2.03157e-11	2.25428e-11	2.37723e-11	2.09403e-11	2.14571e-11	2.11875e-11	2.97751e-11	2.20747e-11	2.33589e-11	3.56052e-11	1.60717e-11	2.15367e-11	2.19233e-11	2.74032e-11	1.75991e-11	2.41768e-11	1.4551e-11
0.81		2.26955e-11	2.09611e-11	5.89837e-11	4.38712e-11	6.58756e-11	3.28036e-11	2.03055e-11	5.73665e-11	3.40793e-11	3.70836e-11	1.60744e-11	1.72357e-11	2.25891e-11	1.53936e-11	2.57761e-11	1.3978e-11	1.65973e-11	2.20954e-11	2.08341e-11	2.24033e-11	1.835e-11	1.37522e-11	1.61001e-11	2.31595e-11	3.42465e-11	1.77137e-11	2.93302e-11	2.57318e-11
0.864		2.2738e-11	2.13758e-11	3.97827e-11	2.42558e-11	1.96857e-11	2.06118e-11	1.69017e-11	3.57199e-11	2.17515e-11	2.23341e-11	2.22796e-11	1.43914e-11	1.61772e-11	1.9578e-11	2.03927e-11	2.59053e-11	1.70761e-11	2.31608e-11	1.83665e-11	2.72008e-11	2.23698e-11	2.84159e-11	2.39046e-11	1.38856e-11	1.53429e-11	5.40948e-11	7.40357e-12	1.57847e-11
0.918		2.49058e-11	4.0096e-11	2.33768e-11	2.66137e-11	2.38792e-11	2.23406e-11	2.24026e-11	2.17634e-11	1.55194e-11	2.54803e-11	1.54234e-11	4.92029e-11	2.23196e-11	2.72383e-11	1.35848e-11	1.45852e-11	2.08494e-11	1.9795e-11	2.03851e-11	2.29505e-11	2.37139e-11	1.98179e-11	2.04964e-11	1.77506e-11	1.83833e-11	1.62369e-11	4.99742e-11	2.16675e-11
0.972		2.41454e-11	1.71281e-11	2.44918e-11	3.01682e-11	2.21621e-11	3.38223e-11	3.28885e-11	1.65799e-11	4.82392e-11	1.9556e-11	1.26748e-11	1.7815e-11	2.83999e-11	1.66097e-11	1.63502e-11	1.81443e-11	2.2929e-11	9.83624e-11	2.07923e-11	3.11068e-11	1.99519e-11	1.64744e-11	1.68065e-11	1.91724e-11	2.51358e-11	2.82005e-11	1.64842e-11	1.95969e-11
1.026		1.80257e-11	4.70223e-11	2.11543e-11	1.89432e-11	2.20683e-11	2.19948e-11	1.15629e-11	1.68156e-11	1.68225e-11	2.14854e-11	2.41744e-11	1.78777e-11	1.88648e-11	2.65948e-11	2.58046e-11	2.2938e-11	4.89964e-11	1.17532e-11	2.03533e-11	1.75671e-11	2.3063e-11	1.91433e-11	1.61327e-11	2.0838e-11	2.67897e-11	1.73331e-11	1.39938e-11	2.05553e-11
1.08		2.03686e-11	2.60436e-11	3.23671e-11	3.11628e-11	3.01921e-11	3.15988e-11	2.28867e-11	2.59026e-11	3.41521e-11	2.26705e-11	2.16007e-11	2.12798e-11	1.89753e-11	1.64993e-11	2.28491e-11	5.08167e-11	1.9128e-11	4.61474e-11	1.84472e-11	1.93634e-11	1.74887e-11	2.71309e-11	2.01484e-11	2.65174e-11	2.67472e-11	2.04533e-11	2.58761e-11	1.93023e-11
1.134		2.22613e-11	2.20267e-11	1.97928e-11	4.95129e-11	3.60087e-11	2.35958e-11	2.70829e-11	1.87418e-11	2.16167e-11	2.33949e-11	1.9551e-11	6.5318e-11	1.05645e-11	2.075e-11	1.61904e-11	2.3929e-11	1.59762e-11	1.52192e-11	2.87943e-11	2.57291e-11	2.15543e-11	2.27067e-11	2.02283e-11	2.32732e-11	1.69176e-11	1.68808e-11	2.99579e-11	2.22197e-11
1.188		1.38106e-11	2.64556e-11	2.64401e-11	2.24953e-11	3.13907e-11	1.2786e-11	2.08922e-11	2.23192e-11	1.09839e-11	2.01171e-11	1.76304e-11	1.35209e-11	3.02163e-11	2.205e-11	1.74158e-11	4.2341e-11	4.87116e-11	1.95579e-11	2.20564e-11	2.70876e-11	2.50774e-11	1.69469e-11	1.85341e-11	2.69592e-11	1.92969e-11	2.92771e-11	2.77774e-11	2.11223e-11
1.242		5.36392e-11	5.15435e-11	2.07393e-11	2.09847e-11	4.8801e-11	1.92278e-11	4.30322e-11	6.30327e-11	1.10304e-11	2.3853e-11	2.12326e-11	3.38204e-11	1.82339e-11	8.04544e-11	2.58791e-11	2.07409e-11	1.96003e-11	2.07819e-11	2.62911e-11	1.82957e-11	2.35306e-11	2.4223e-11	2.09021e-11	1.7719e-11	3.21123e-11	2.18508e-11	3.14819e-11	2.26199e-11
1.296		3.49174e-11	1.722e-11	4.51994e-11	2.30735e-11	2.72343e-11	2.75427e-11	2.34006e-11	2.10368e-11	2.45662e-11	1.78415e-11	2.46079e-11	2.18433e-11	2.25129e-11	5.29122e-11	2.14342e-11	2.55958e-11	2.5087e-11	2.32666e-11	2.11695e-11	1.39808e-11	2.2333e-11	1.72761e-11	2.41987e-11	2.39979e-11	1.93079e-11	2.10304e-11	1.42398e-11	1.43733e-11
1.35		1.66815e-11	1.95913e-11	1.9189e-11	1.69865e-11	2.63312e-11	4.69055e-11	2.87499e-11	2.25393e-11	1.40844e-11	2.16633e-11	2.0363e-11	1.74673e-11	2.53489e-11	1.14143e-11	1.89353e-11	2.01463e-11	3.75477e-11	2.01386e-11	1.72254e-11	1.98949e-11	2.52414e-11	3.44681e-11	2.47203e-11	2.07143e-11	2.31047e-11	2.89834e-11	2.51503e-11	2.0331e-11
1.404		3.0019e-11	3.29537e-11	2.16989e-11	4.59308e-11	2.88819e-11	4.40956e-11	1.94801e-11	1.61509e-11	1.58081e-11	3.03663e-11	2.42794e-11	5.10495e-11	1.68684e-11	1.93624e-11	2.38807e-11	4.86004e-11	2.26922e-11	6.36646e-11	2.22982e-11	3.81002e-11	1.57431e-11	2.65534e-11	2.49739e-11	2.3708e-11	1.15434e-11	1.56124e-11	1.83395e-11	2.2738e-11
1.458		3.39242e-11	3.63333e-11	2.68243e-11	7.67161e-11	1.87333e-11	3.16891e-11	1.38188e-11	1.94119e-11	1.52574e-11	2.02609e-11	2.05934e-11	1.68466e-11	2.22955e-11	2.63888e-11	7.06998e-11	2.13083e-11	1.64517e-11	2.23261e-11	2.48941e-11	2.20752e-11	7.26629e-11	2.52852e-11	1.24935e-11	1.80269e-11	2.58903e-11	2.11646e-11	2.30262e-11	2.15111e-11
1.512		1.62263e-11	2.53845e-11	2.3361e-11	4.67193e-11	4.11178e-11	1.82685e-11	3.21688e-11	1.80929e-11	2.06451e-11	6.5745e-11	2.43507e-11	1.7511e-11	3.74931e-11	1.65209e-11	1.96795e-11	1.41205e-11	2.24405e-11	2.42176e-11	2.48495e-11	2.49822e-11	1.77601e-11	2.81191e-11	2.22759e-11	1.92868e-11	1.99115e-11	5.04006e-11	1.4483e-11	3.84962e-11
1.566

[truncated: 3 more sheets: D exp3 p3, D exp3 p4, D exp3 p5]
